# Supplementary material for: Sequential halochromic/mechanochromic luminescence of pyridyl-substituted solid-state emissive dyes: thermally controlled stepwise recovery of the original emission color
Source: Royal Society of Chemistry journal article supplement (doi:10.1039/c9ce01037h), 2019-01-01

**Sequential halochromic/mechanochromic luminescence of  
pyridyl-substituted solid-state emissive dyes:  
thermally controlled stepwise recovery of the original emission color**

Suguru Ito,\* Chika Nishimoto and Sayaka Nagai

\*E-mail: suguru-ito@ynu.ac.jp

*<sup>a</sup> Department of Advanced Materials Chemistry, Graduate School of Engineering,  
Yokohama National University, 79-5 Tokiwadai, Hodogaya-ku, Yokohama 240-8501, Japan*

**Table of contents**

|                                                                       |     |
|-----------------------------------------------------------------------|-----|
| 1. Single-crystal X-ray diffraction analyses.....                     | S2  |
| 2. Absorption spectra.....                                            | S7  |
| 3. Theoretical calculations.....                                      | S8  |
| 4. <sup>1</sup> H NMR spectrum of 1 after heating <b>1•2a–d</b> ..... | S10 |
| 5. Powder X-ray diffraction analyses of <b>1•2b–d</b> .....           | S12 |
| 6. Differential scanning calorimetry (DSC) analyses.....              | S14 |
| 7. Powder X-ray diffraction analyses of <b>4/2a–d</b> .....           | S16 |
| 8. References.....                                                    | S18 |
| NMR spectra.....                                                      | S20 |

## 1. Single-crystal X-ray diffraction analyses

### X-ray analysis of 1

A single crystal of **1** was obtained from vapor diffusion of hexane into a chloroform/DMF solution of **1** and was mounted on a glass fiber. All measurements were made on a Rigaku XtaLAB P200 diffractometer using multi-layer mirror monochromated Cu-K $\alpha$  radiation ( $\lambda = 1.54184 \text{ \AA}$ ). The data were collected at a temperature of  $-50 \pm 1 \text{ }^\circ\text{C}$  to a maximum  $2\theta$  value of  $150.5^\circ$ . A total of 2786 oscillation images were collected. The crystal-to-detector distance was 40.00 mm. Readout was performed in the 0.172 mm pixel mode.

Of the 25682 reflections that were collected, 4448 were unique ( $R_{\text{int}} = 0.0301$ ); equivalent reflections were merged. Data were collected and processed using CrysAlisPro (Rigaku Oxford Diffraction).<sup>1</sup> The linear absorption coefficient,  $\mu$ , for Cu-K $\alpha$  radiation is  $14.374 \text{ cm}^{-1}$ . An empirical absorption correction was applied which resulted in transmission factors ranging from 0.654 to 0.826. The data were corrected for Lorentz and polarization effects.

The structure was solved by direct methods (SIR2011)<sup>2</sup> and expanded using Fourier techniques. The non-hydrogen atoms were refined anisotropically. Hydrogen atoms were refined using the riding model. All calculations were performed using the CrystalStructure<sup>3</sup> crystallographic software package except for refinement, which was performed using SHELXL Version 2014/7.<sup>4</sup>

Crystal data for **1** (CCDC 1935319):  $\text{C}_{32}\text{H}_{19}\text{N}_5\text{S}$ ,  $M = 505.60$ , monoclinic,  $a = 9.71088(5) \text{ \AA}$ ,  $b = 16.39216(9) \text{ \AA}$ ,  $c = 15.37234(9) \text{ \AA}$ ,  $\beta = 97.2646(5)^\circ$ ,  $V = 2427.36(2) \text{ \AA}^3$ , space group  $P2_1/n$  (no. 14),  $Z = 4$ ,  $D_c = 1.383 \text{ g cm}^{-3}$ ,  $F(000) = 1048.00$ ,  $T = 223(1) \text{ K}$ ,  $\mu(\text{Cu-K}\alpha) = 14.374 \text{ cm}^{-1}$ , 25682 reflections measured, 4448 independent ( $R_{\text{int}} = 0.0301$ ). The final refinement converged to  $R_1 = 0.0346$  for  $I > 2.0\sigma(I)$ ,  $wR_2 = 0.0919$  for all data.

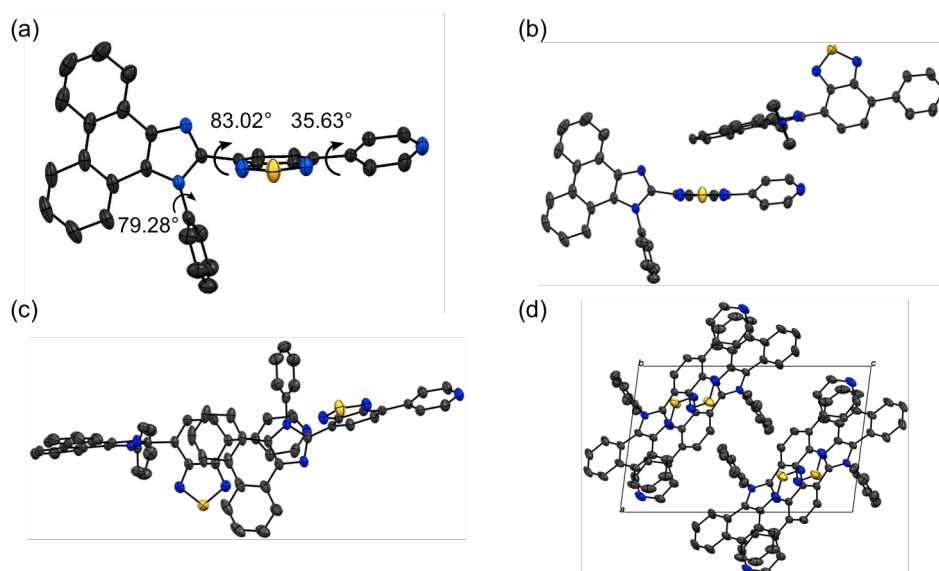

**Fig. S1** The molecular structure of **1** with atomic displacement parameters set at 50% probability (Color code: gray = C, blue = N, yellow = S). All hydrogen atoms are omitted for clarity. (a) Front view. (b) Side view of neighbouring two molecules. (c) Top view of neighbouring two molecules. (d) Unit cell structure viewed along  $b$ -axis.

### X-ray analysis of 1•2a

A single crystal of **1•2a** was obtained from vapor diffusion of hexane into a chloroform solution of a 1:1 molar mixture of **1** and **2a** and was mounted on a glass fiber. All measurements were made on a Rigaku XtaLAB P200 diffractometer using graphite monochromated Cu-K $\alpha$  radiation ( $\lambda = 1.54184$  Å). The data were collected at a temperature of  $-50 \pm 1$  °C to a maximum  $2\theta$  value of  $152.2^\circ$ . A total of 3032 oscillation images were collected. The crystal-to-detector distance was 40.00 mm. Readout was performed in the 0.172 mm pixel mode.

Of the 33807 reflections that were collected, 5609 were unique ( $R_{\text{int}} = 0.0471$ ); equivalent reflections were merged. Data were collected and processed using CrysAlisPro (Rigaku Oxford Diffraction).<sup>1</sup> The linear absorption coefficient,  $\mu$ , for Cu-K $\alpha$  radiation is  $12.956 \text{ cm}^{-1}$ . An empirical absorption correction was applied which resulted in transmission factors ranging from 0.570 to 0.768. The data were corrected for Lorentz and polarization effects.

The structure was solved by direct methods (SIR2011)<sup>2</sup> and expanded using Fourier techniques. The non-hydrogen atoms were refined anisotropically. Hydrogen atoms were refined using the riding model. The positions of hydrogen atoms of carboxy groups were localized from the differential Fourier synthesis. All calculations were performed using the CrystalStructure<sup>3</sup> crystallographic software package except for refinement, which was performed using SHELXL Version 2014/7.<sup>4</sup>

Crystal data for **1•2a** (CCDC 1935320):  $\text{C}_{39}\text{H}_{25}\text{N}_5\text{O}_2\text{S}$ ,  $M = 627.72$ , monoclinic,  $a = 9.93969(8)$  Å,  $b = 17.64482(16)$  Å,  $c = 17.57204(14)$  Å,  $\beta = 93.1282(8)^\circ$ ,  $V = 3077.26(4)$  Å<sup>3</sup>, space group  $P2_1/n$  (no. 14),  $Z = 4$ ,  $D_c = 1.355 \text{ g cm}^{-3}$ ,  $F(000) = 1304.00$ ,  $T = 223(1)$  K,  $\mu(\text{Cu-K}\alpha) = 12.956 \text{ cm}^{-1}$ , 33807 reflections measured, 5609 independent ( $R_{\text{int}} = 0.0471$ ). The final refinement converged to  $R_1 = 0.0355$  for  $I > 2.0\sigma(I)$ ,  $wR_2 = 0.0942$  for all data.

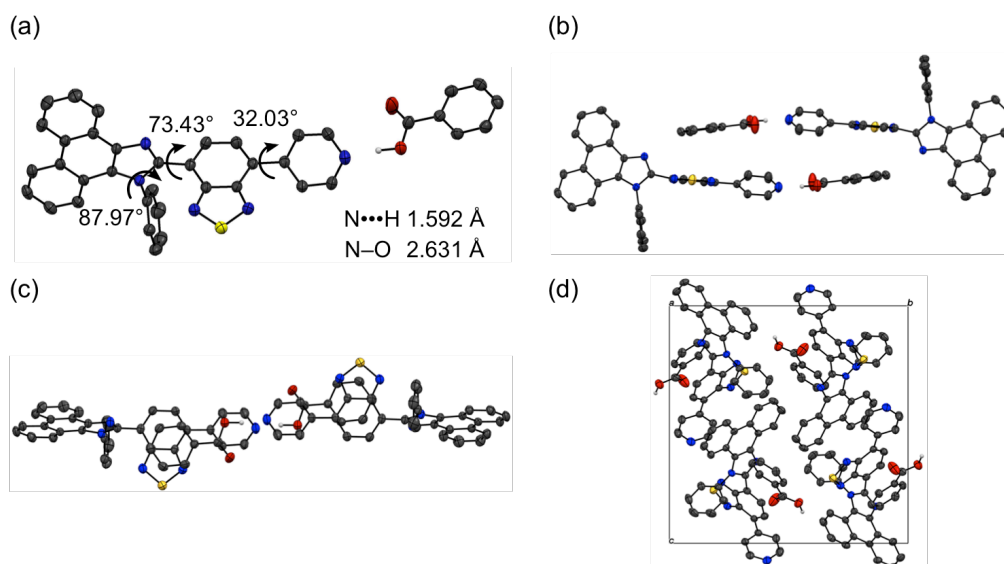

**Fig. S2** The molecular structure of **1•2a** with atomic displacement parameters set at 50% probability (Color code: gray = C, red = O, blue = N, yellow = S). All hydrogen atoms except for carboxy group are omitted for clarity. (a) Front view. (b) Side view of neighbouring two complexes. (c) Top view of neighbouring two complexes. (d) Unit cell structure viewed along  $a$ -axis.

### X-ray analysis of 1•2b

A single crystal of **1•2b** was obtained from vapor diffusion of hexane into a chloroform solution of a 1:1 molar mixture of **1** and **2b** and was mounted on a glass fiber. All measurements were made on a Rigaku XtaLAB P200 diffractometer using graphite monochromated Cu-K $\alpha$  radiation ( $\lambda = 1.54184$  Å). The data were collected at a temperature of  $-50 \pm 1$  °C to a maximum  $2\theta$  value of  $150.4^\circ$ . A total of 4052 oscillation images were collected. The crystal-to-detector distance was 40.00 mm. Readout was performed in the 0.172 mm pixel mode.

Of the 47704 reflections that were collected, 5951 were unique ( $R_{\text{int}} = 0.0425$ ); equivalent reflections were merged. Data were collected and processed using CrysAlisPro (Rigaku Oxford Diffraction).<sup>1</sup> The linear absorption coefficient,  $\mu$ , for Cu-K $\alpha$  radiation is  $14.217 \text{ cm}^{-1}$ . An empirical absorption correction was applied which resulted in transmission factors ranging from 0.721 to 0.872. The data were corrected for Lorentz and polarization effects.

The structure was solved by direct methods (SIR2011)<sup>2</sup> and expanded using Fourier techniques. The non-hydrogen atoms were refined anisotropically. Hydrogen atoms were refined using the riding model. The positions of hydrogen atoms of carboxy groups were localized from the differential Fourier synthesis. All calculations were performed using the CrystalStructure<sup>3</sup> crystallographic software package except for refinement, which was performed using SHELXL Version 2014/7.<sup>4</sup>

Crystal data for **1•2b** (CCDC 1935321):  $\text{C}_{40}\text{H}_{24}\text{F}_3\text{N}_5\text{O}_2\text{S}$ ,  $M = 695.72$ , monoclinic,  $a = 10.12758(5)$  Å,  $b = 16.68174(10)$  Å,  $c = 19.48203(10)$  Å,  $\beta = 99.0942(5)^\circ$ ,  $V = 3250.03(3)$  Å<sup>3</sup>, space group  $P2_1/n$  (no. 14),  $Z = 4$ ,  $D_c = 1.422 \text{ g cm}^{-3}$ ,  $F(000) = 1432.00$ ,  $T = 223(1)$  K,  $\mu(\text{Cu-K}\alpha) = 14.217 \text{ cm}^{-1}$ , 47704 reflections measured, 5951 independent ( $R_{\text{int}} = 0.0425$ ). The final refinement converged to  $R_1 = 0.0568$  for  $I > 2.0\sigma(I)$ ,  $wR_2 = 0.1623$  for all data.

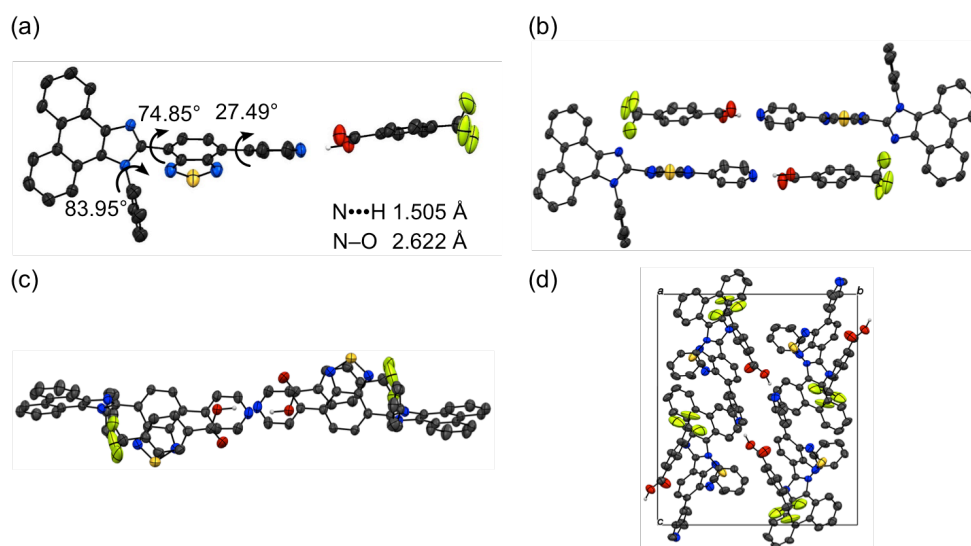

**Fig. S3** The molecular structure of **1•2b** with atomic displacement parameters set at 50% probability (Color code: gray = C, red = O, blue = N, yellow = S, green = F). All hydrogen atoms except for carboxy group are omitted for clarity. (a) Front view. (b) Side view of neighbouring two complexes. (c) Top view of neighbouring two complexes. (d) Unit cell structure viewed along  $a$ -axis.



### X-ray analysis of 1•2c

A single crystal of **1•2c** was obtained from vapor diffusion of hexane into a chloroform solution of a 1:1 molar mixture of **1** and **2c** and was mounted on a glass fiber. All measurements were made on a Rigaku XtaLAB P200 diffractometer using graphite monochromated Cu-K $\alpha$  radiation ( $\lambda = 1.54184$  Å). The data were collected at a temperature of  $-50 \pm 1$  °C to a maximum  $2\theta$  value of  $150.6^\circ$ . A total of 2916 oscillation images were collected. The crystal-to-detector distance was 40.00 mm. Readout was performed in the 0.172 mm pixel mode.

Of the 34401 reflections that were collected, 5741 were unique ( $R_{\text{int}} = 0.0333$ ); equivalent reflections were merged. Data were collected and processed using CrysAlisPro (Rigaku Oxford Diffraction).<sup>1</sup> The linear absorption coefficient,  $\mu$ , for Cu-K $\alpha$  radiation is  $13.041 \text{ cm}^{-1}$ . An empirical absorption correction was applied which resulted in transmission factors ranging from 0.696 to 0.795. The data were corrected for Lorentz and polarization effects.

The structure was solved by direct methods (SIR2011)<sup>2</sup> and expanded using Fourier techniques. The non-hydrogen atoms were refined anisotropically. Hydrogen atoms were refined using the riding model. The positions of hydrogen atoms of carboxy groups were localized from the differential Fourier synthesis. All calculations were performed using the CrystalStructure<sup>3</sup> crystallographic software package except for refinement, which was performed using SHELXL Version 2014/7.<sup>4</sup>

Crystal data for **1•2c** (CCDC 1935322):  $\text{C}_{40}\text{H}_{24}\text{N}_6\text{O}_2\text{S}$ ,  $M = 652.73$ , monoclinic,  $a = 9.72297(7)$  Å,  $b = 17.69375(11)$  Å,  $c = 18.28982(12)$  Å,  $\beta = 94.3128(6)^\circ$ ,  $V = 3137.59(4)$  Å<sup>3</sup>, space group  $P2_1/n$  (no. 14),  $Z = 4$ ,  $D_c = 1.382 \text{ g cm}^{-3}$ ,  $F(000) = 1352.00$ ,  $T = 223(1)$  K,  $\mu(\text{Cu-K}\alpha) = 13.041 \text{ cm}^{-1}$ , 34401 reflections measured, 5741 independent ( $R_{\text{int}} = 0.0333$ ). The final refinement converged to  $R_1 = 0.0357$  for  $I > 2.0\sigma(I)$ ,  $wR_2 = 0.0942$  for all data.

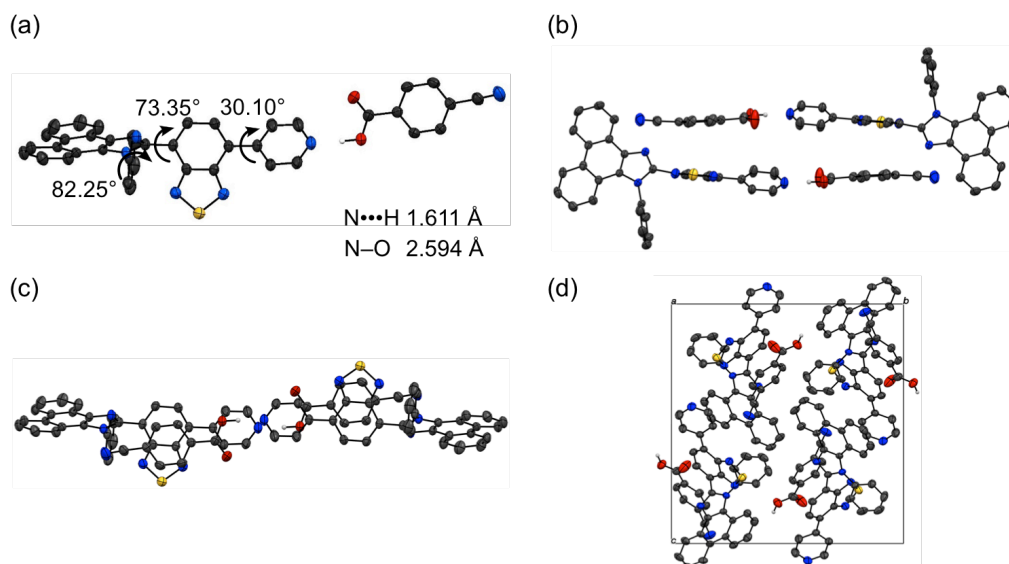

**Fig. S4** The molecular structure of **1•2c** with atomic displacement parameters set at 50% probability (Color code: gray = C, red = O, blue = N, yellow = S). All hydrogen atoms except for carboxy group are omitted for clarity. (a) Front view. (b) Side view of neighbouring two complexes. (c) Top view of neighbouring two complexes. (d) Unit cell structure viewed along  $a$ -axis.

### X-ray analysis of 1•2d

A single crystal of **1•2d** was obtained from vapor diffusion of hexane into a chloroform solution of a 1:1 molar mixture of **1** and **2d** and was mounted on a glass fiber. All measurements were made on a Rigaku XtaLAB P200 diffractometer using graphite monochromated Cu-K $\alpha$  radiation ( $\lambda = 1.54184$  Å). The data were collected at a temperature of  $-50 \pm 1$  °C to a maximum  $2\theta$  value of  $152.0^\circ$ . A total of 3226 oscillation images were collected. The crystal-to-detector distance was 40.00 mm. Readout was performed in the 0.172 mm pixel mode.

Of the 36448 reflections that were collected, 5700 were unique ( $R_{\text{int}} = 0.0452$ ); equivalent reflections were merged. Data were collected and processed using CrysAlisPro (Rigaku Oxford Diffraction).<sup>1</sup> The linear absorption coefficient,  $\mu$ , for Cu-K $\alpha$  radiation is  $13.822$  cm $^{-1}$ . An empirical absorption correction was applied which resulted in transmission factors ranging from 0.284 to 0.643. The data were corrected for Lorentz and polarization effects.

The structure was solved by direct methods (SIR2011)<sup>2</sup> and expanded using Fourier techniques. The non-hydrogen atoms were refined anisotropically. Hydrogen atoms were refined using the riding model. The positions of hydrogen atoms of carboxy groups were localized from the differential Fourier synthesis. All calculations were performed using the CrystalStructure<sup>3</sup> crystallographic software package except for refinement, which was performed using SHELXL Version 2014/7.<sup>4</sup>

Crystal data for **1•2d** (CCDC 1935323): C<sub>39</sub>H<sub>24</sub>N<sub>6</sub>O<sub>4</sub>S,  $M = 672.72$ , monoclinic,  $a = 9.74862(8)$  Å,  $b = 17.91753(15)$  Å,  $c = 17.82303(15)$  Å,  $\beta = 92.1261(8)^\circ$ ,  $V = 3111.03(4)$  Å<sup>3</sup>, space group  $P2_1/n$  (no. 14),  $Z = 4$ ,  $D_c = 1.436$  g cm $^{-3}$ ,  $F(000) = 1392.00$ ,  $T = 223(1)$  K,  $\mu(\text{Cu-K}\alpha) = 13.822$  cm $^{-1}$ , 36448 reflections measured, 5700 independent ( $R_{\text{int}} = 0.0452$ ). The final refinement converged to  $R_1 = 0.0389$  for  $I > 2.0\sigma(I)$ ,  $wR_2 = 0.1062$  for all data.

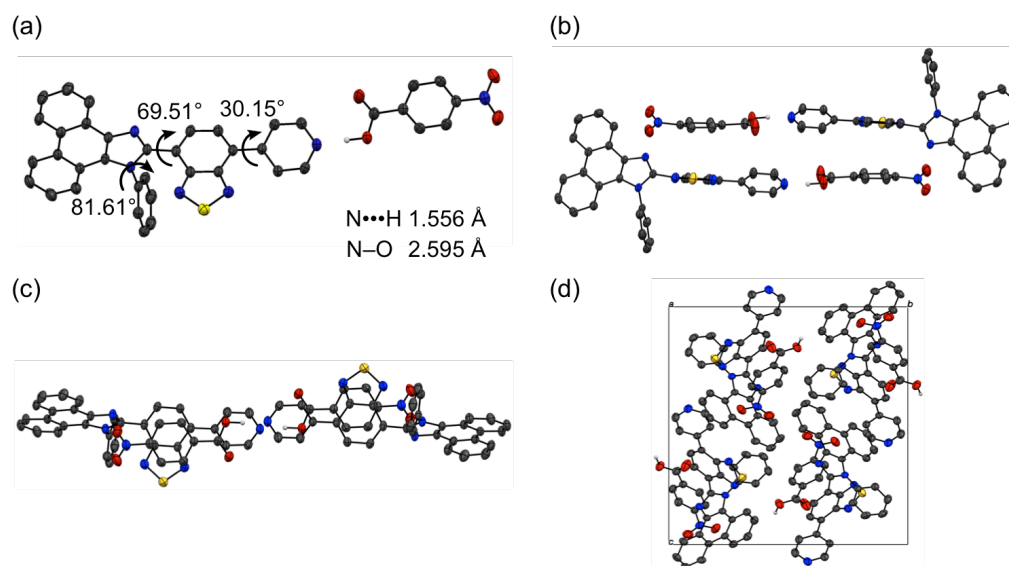

**Fig. S5** The molecular structure of **1•2d** with atomic displacement parameters set at 50% probability (Color code: gray = C, red = O, blue = N, yellow = S). All hydrogen atoms except for carboxy group are omitted for clarity. (a) Front view. (b) Side view of neighbouring two complexes. (c) Top view of neighbouring two complexes. (d) Unit cell structure viewed along  $a$ -axis.

## 2. Absorption spectra

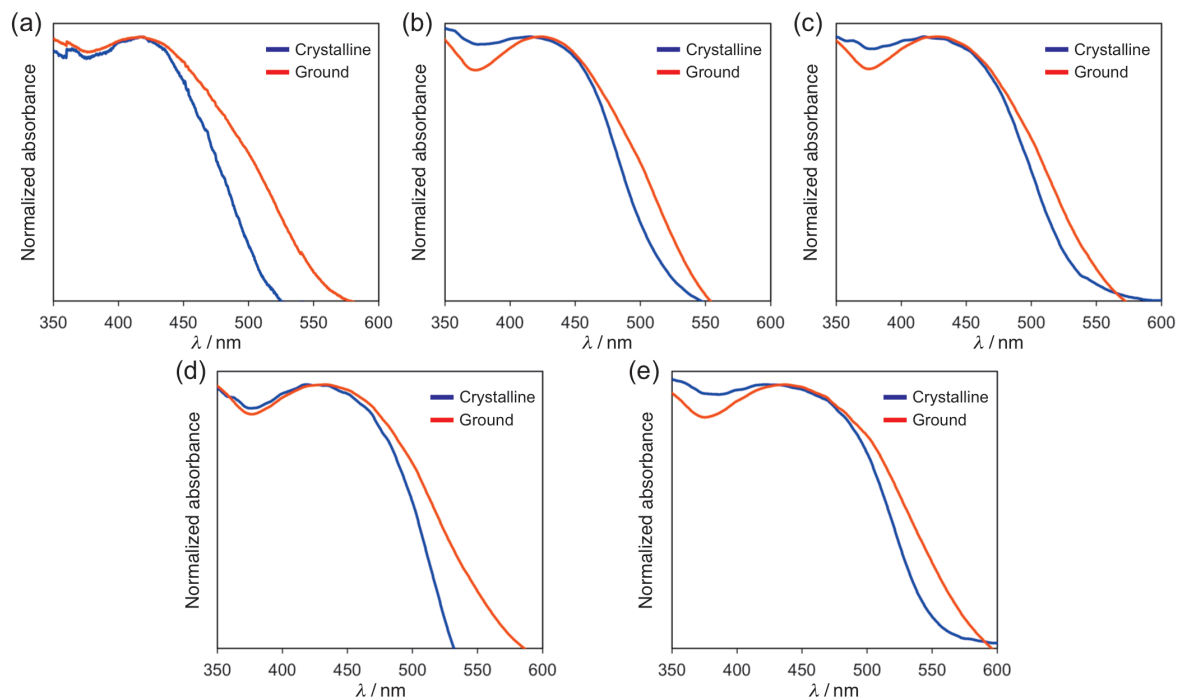

**Fig. S6** Solid-state absorption spectra of crystalline and ground **1** (a), **1•2a** (b), **1•2b** (c), **1•2c** (d), and **1•2d** (e).

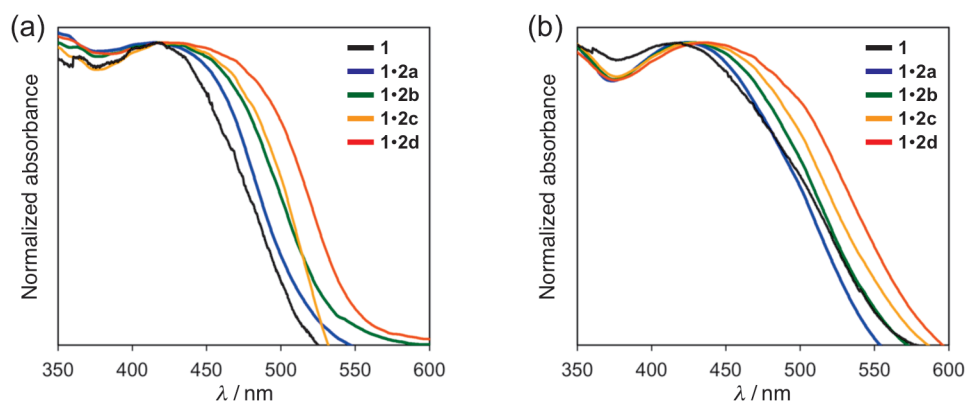

**Fig. S7** Solid-state absorption spectra of (a) crystalline and (b) ground **1** and **1•2a-d**.

### 3. Theoretical calculations

Based on the single-crystal X-ray diffraction structures, absorption wavelengths of **1** in **1•2a–d** and discrete hydrogen-bond-forming complexes **1•2a–d** were calculated by time-dependent density functional theory (TD-DFT) at the CAM-B3LYP/6-31G(d) level of theory (Table S1).

**Table S1** Experimental absorption maxima and calculated absorption properties of **1a–f**.

| Compd         | Absorption<br>in crystal<br>$\lambda_{\text{abs}}$ (nm) | Calcd<br>absorption<br>$\lambda_{\text{abs}}$ (nm) | Transition from<br>HOMO to LUMO | Oscillator<br>strength | HOMO<br>(eV) | LUMO<br>(eV) | Dipole<br>moment<br>(D) |
|---------------|---------------------------------------------------------|----------------------------------------------------|---------------------------------|------------------------|--------------|--------------|-------------------------|
| <b>1</b>      | 417                                                     | 355.82                                             | 0.68612                         | 0.0260                 | -6.65        | -1.47        | 4.5684                  |
| <b>1•(2a)</b> |                                                         | 366.65                                             | 0.66808                         | 0.1687                 | -6.61        | -1.50        | 4.4719                  |
| <b>1•2a</b>   | 415                                                     | 379.96                                             | 0.67844                         | 0.1542                 | -6.70        | -1.74        | 6.3147                  |
| <b>1•(2b)</b> |                                                         | 362.65                                             | 0.67160                         | 0.1459                 | -6.64        | -1.49        | 4.3196                  |
| <b>1•2b</b>   | 417                                                     | 382.77                                             | 0.68249                         | 0.1248                 | -6.78        | -1.86        | 9.2723                  |
| <b>1•(2c)</b> |                                                         | 371.73                                             | 0.66515                         | 0.2196                 | -6.60        | -1.51        | 4.3534                  |
| <b>1•2c</b>   | 419                                                     | 386.76                                             | 0.67679                         | 0.2087                 | -6.74        | -1.82        | 10.2904                 |
| <b>1•(2d)</b> |                                                         | 368.35                                             | 0.66025                         | 0.2450                 | -6.63        | -1.50        | 4.3407                  |
| <b>1•2d</b>   | 422                                                     | 385.37                                             | 0.67547                         | 0.2295                 | -6.79        | -1.86        | 11.1922                 |

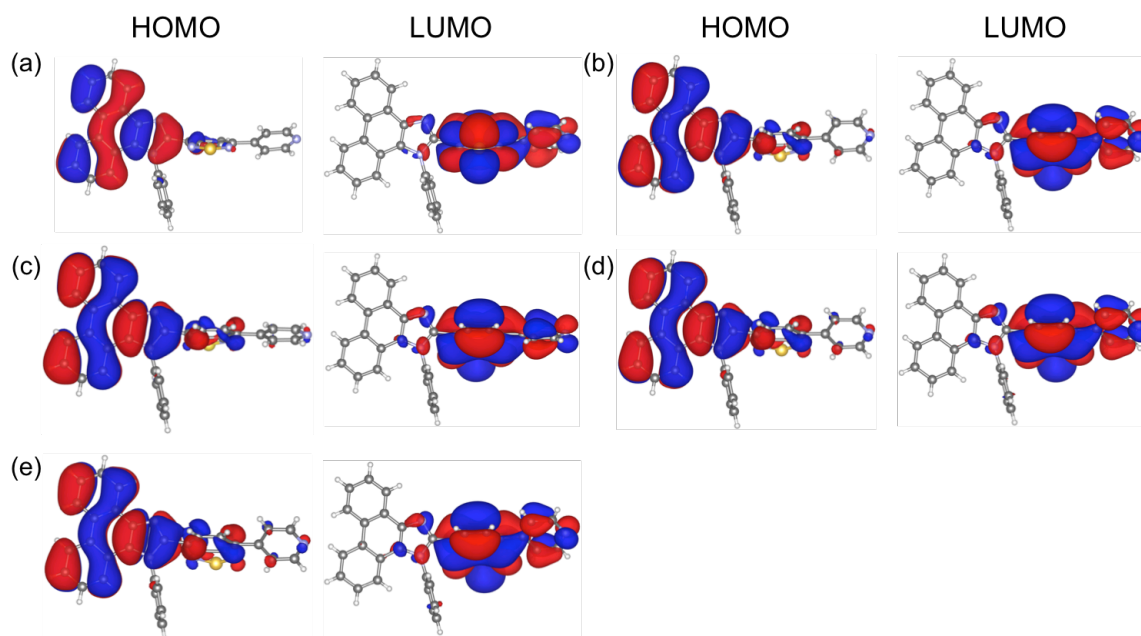

**Fig. S8** HOMO and LUMO of **1** (a), **1•(2a)** (b), **1•(2b)** (c), **1•(2c)** (d), and **1•(2d)** (e) calculated at the CAM-B3LYP/6-31G(d) level. The structures are drawn by VESTA.<sup>5</sup>

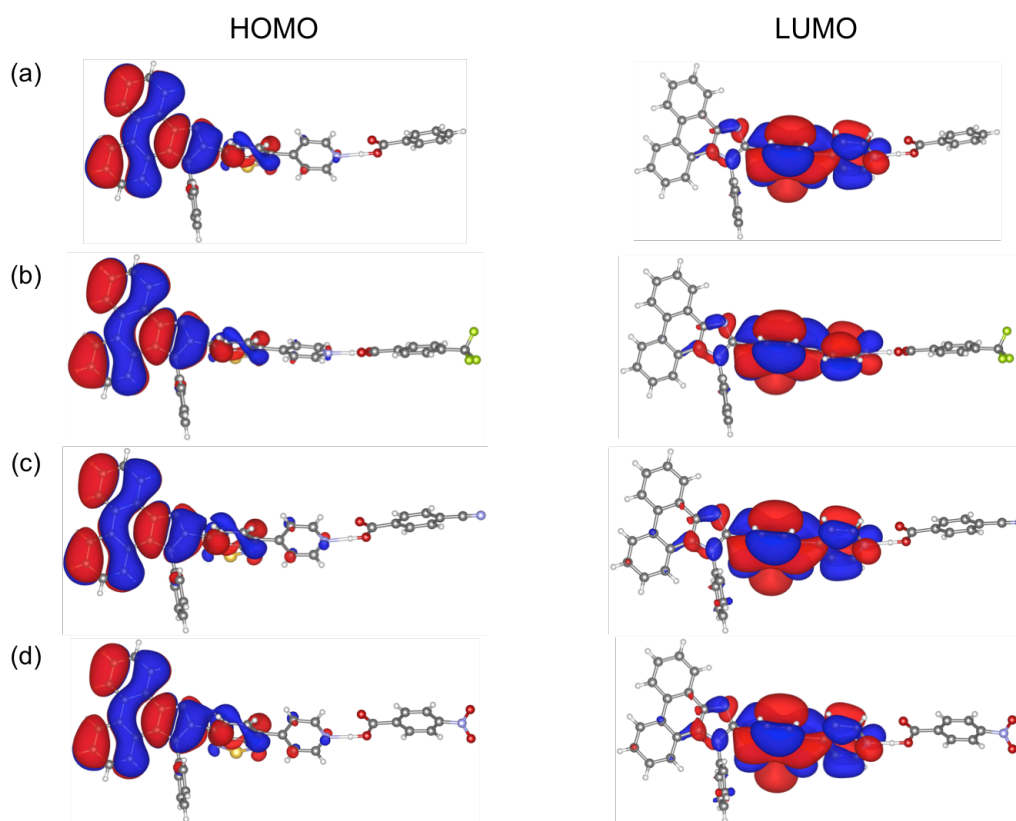

**Fig. S9** HOMO and LUMO of **1•2a** (a), **1•2b** (b), **1•2c** (c), and **1•2d** (d) calculated at the CAM-B3LYP/6-31G(d) level. The structures are drawn by VESTA.<sup>5</sup>

#### 4. $^1\text{H}$ NMR spectrum of **1** after heating **1**•**2a**–**d**

$^1\text{H}$  NMR analyses revealed the absence of benzoic acid derivatives **2a**–**d** after heating **1**•**2a**–**d** to 185–260 °C (Fig. S10–S13).

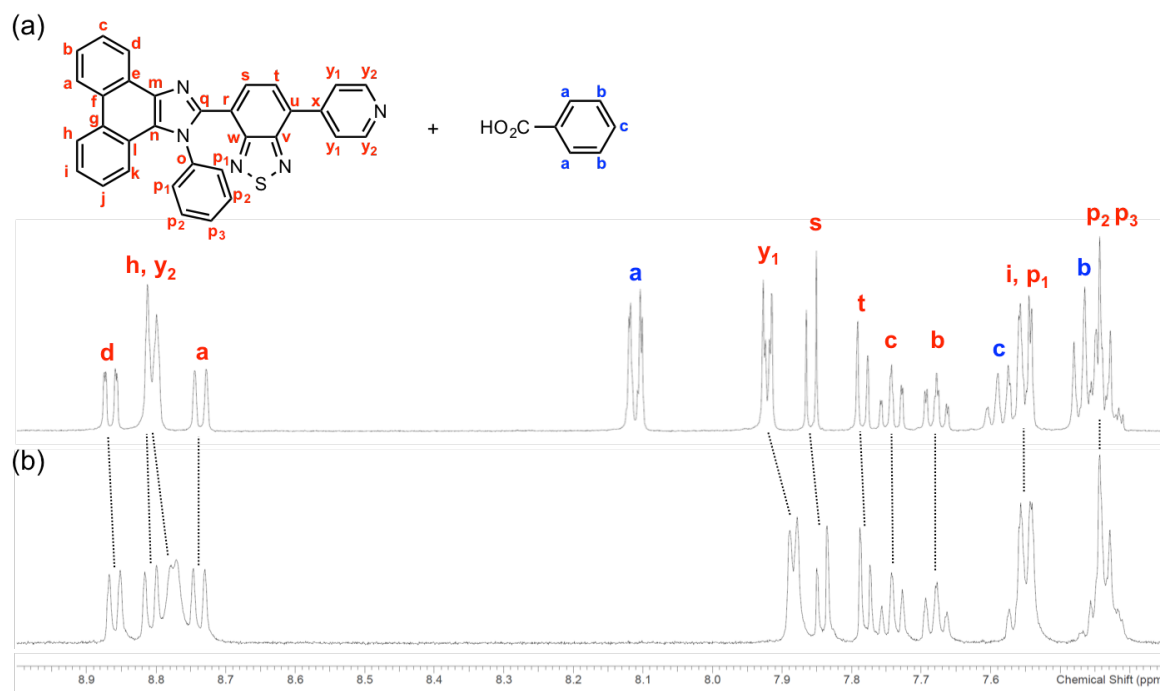

**Fig. S10**  $^1\text{H}$  NMR spectra of (a) crystalline **1**•**2a** and (b) crystalline **1** obtained after heating **1**•**2a** (500 MHz, in  $\text{CDCl}_3$ ).

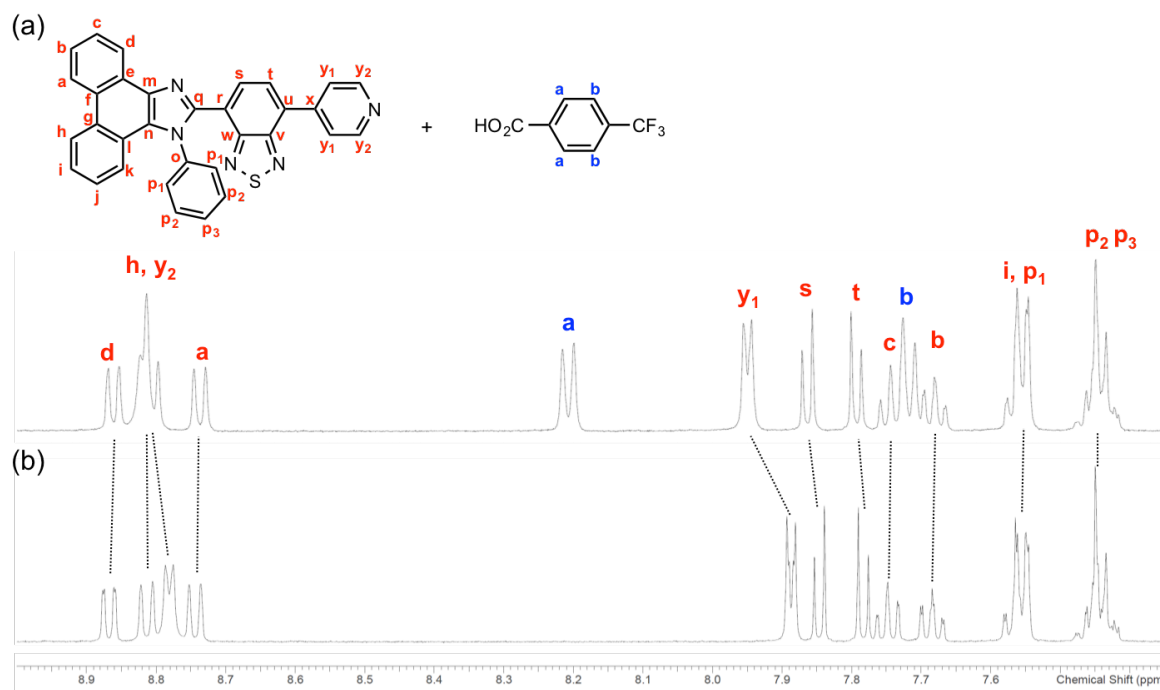

**Fig. S11**  $^1\text{H}$  NMR spectra of (a) crystalline **1**•**2b** and (b) crystalline **1** obtained after heating **1**•**2b** (500 MHz, in  $\text{CDCl}_3$ ).

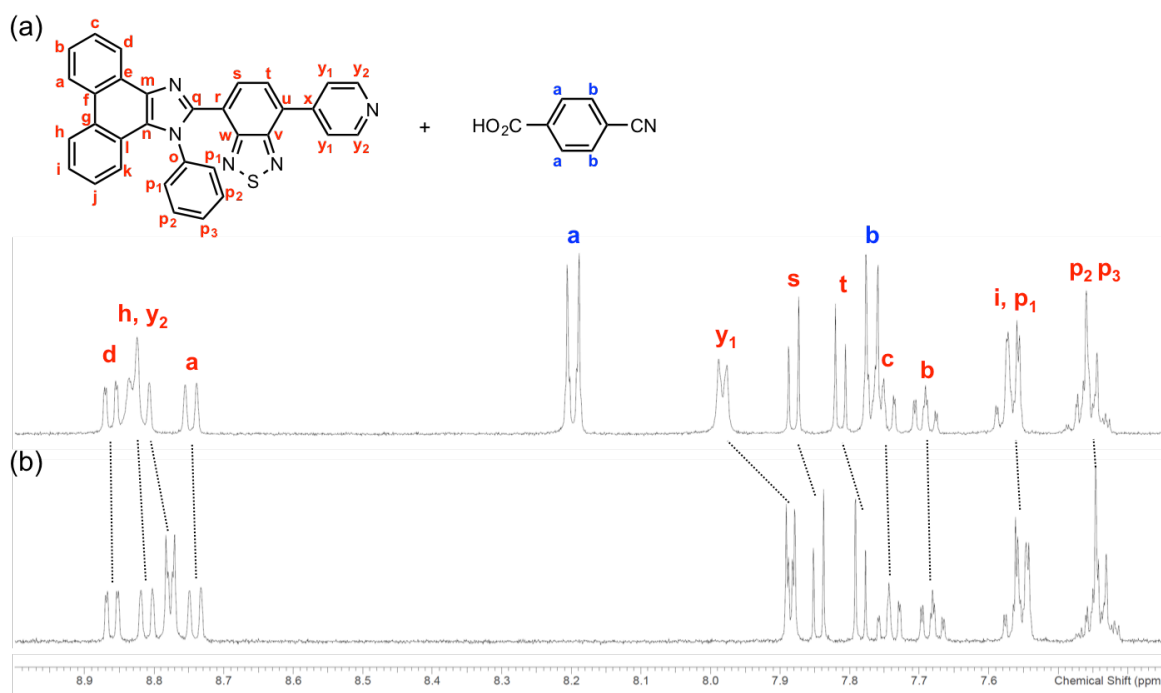

**Fig. S12**  $^1\text{H}$  NMR spectra of (a) crystalline **1•2c** and (b) crystalline **1** obtained after heating **1•2c** (500 MHz, in  $\text{CDCl}_3$ ).

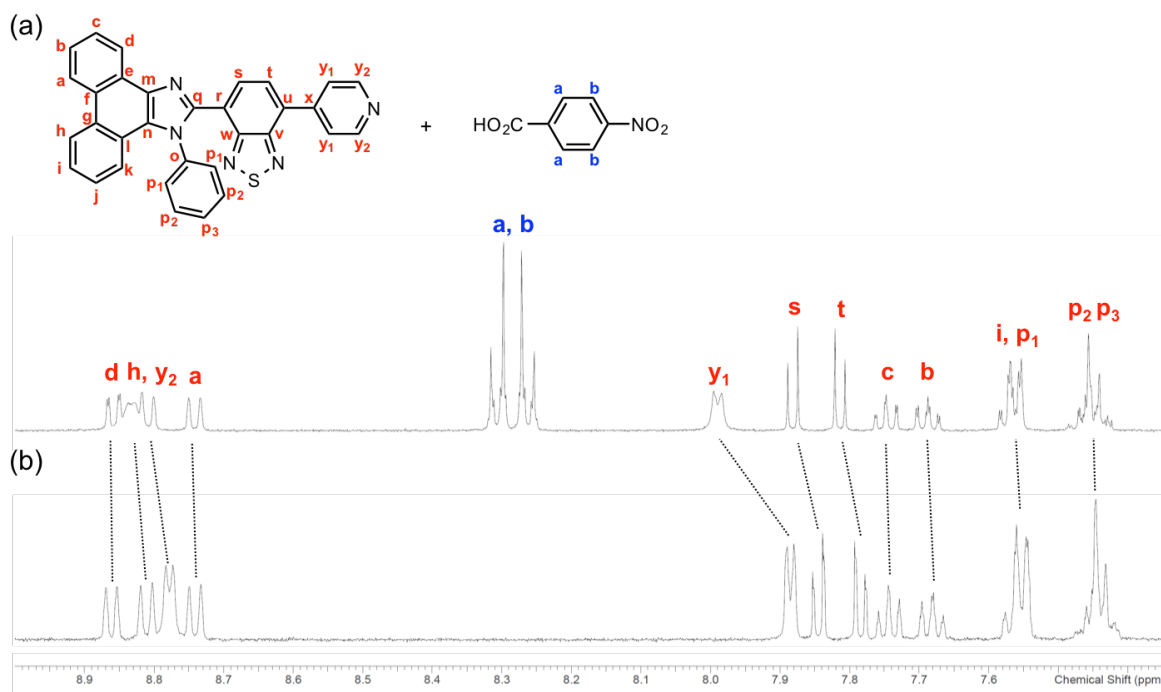

**Fig. S13**  $^1\text{H}$  NMR spectra of (a) crystalline **1•2d** and (b) crystalline **1** obtained after heating **1•2d** (500 MHz, in  $\text{CDCl}_3$ ).



## 5. Powder X-ray diffraction analyses of 1•2b–d

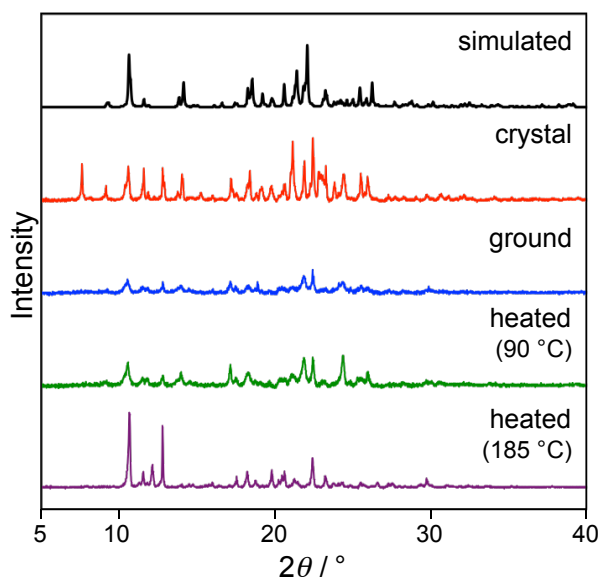

**Fig. S14** PXRD patterns for **1•2b**. Black line: Simulated PXRD pattern calculated from the single-crystal structure. Red line: Experimental PXRD pattern of the powdered crystalline sample. Blue line: Experimental PXRD pattern of the ground sample. Green line: Experimental PXRD pattern of the sample after heating to 90 °C. Purple line: Experimental PXRD pattern of the sample after heating to 185 °C.

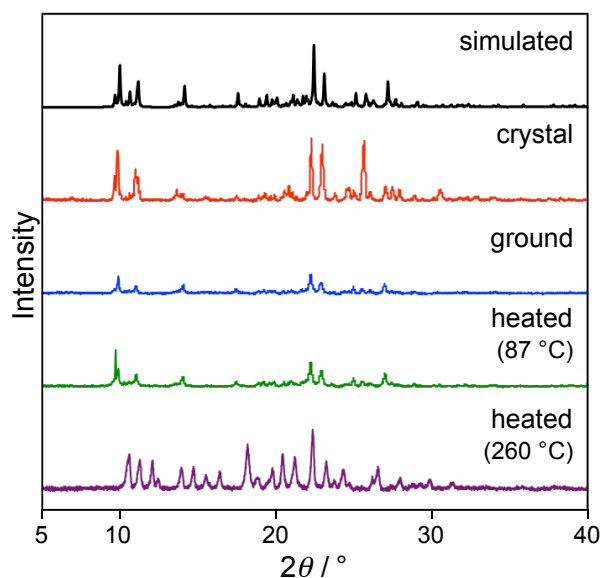

**Fig. S15** PXRD patterns for **1•2c**. Black line: Simulated PXRD pattern calculated from the single-crystal structure. Red line: Experimental PXRD pattern of the powdered crystalline samples. Blue line: Experimental PXRD pattern of the ground sample. Green line: Experimental PXRD pattern of the sample after heating to 87 °C. Purple line: Experimental PXRD pattern of the sample after heating to 260 °C.

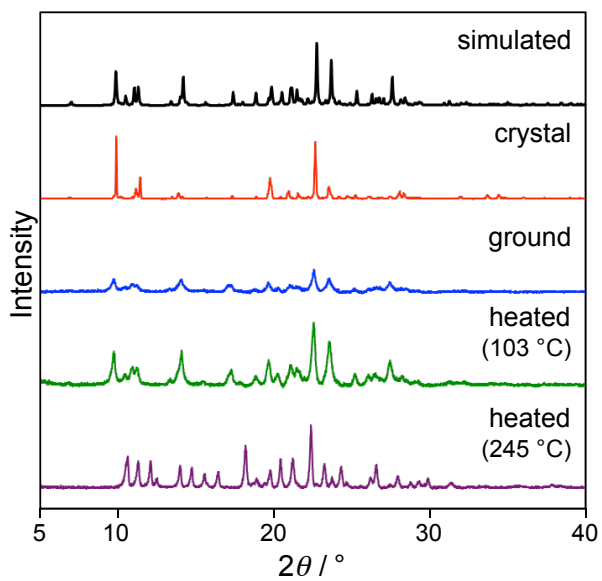

**Fig. S16** PXRD patterns for **1•2d**. Black line: Simulated PXRD pattern calculated from the single-crystal structure. Red line: Experimental PXRD pattern of the powdered crystalline sample. Blue line: Experimental PXRD pattern of the ground sample. Green line: Experimental PXRD pattern of the sample after heating to 103 °C. Purple line: Experimental PXRD pattern of the sample after heating to 245 °C.

## 6. Differential scanning calorimetry (DSC) analyses

In the DSC thermograms of **1•2b–d**, endothermic peaks that correspond to the vaporization of **2b–d** ( $T_v$ ) and the melting points of **1** ( $T_m$ ) were observed for crystalline samples, and cold crystallization transition peaks ( $T_c$ ) followed by  $T_v$  and  $T_m$  were observed for ground samples (Fig. S17–S19).

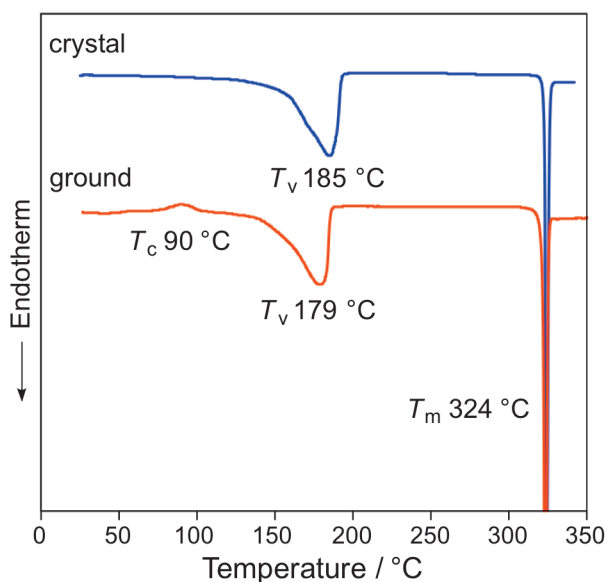

**Fig. S17** DSC thermograms of **1•2b** for powdered crystalline sample (blue line) and ground sample (red sample).  $T_v$ ,  $T_c$ , and  $T_m$  values are noted near the corresponding peaks.

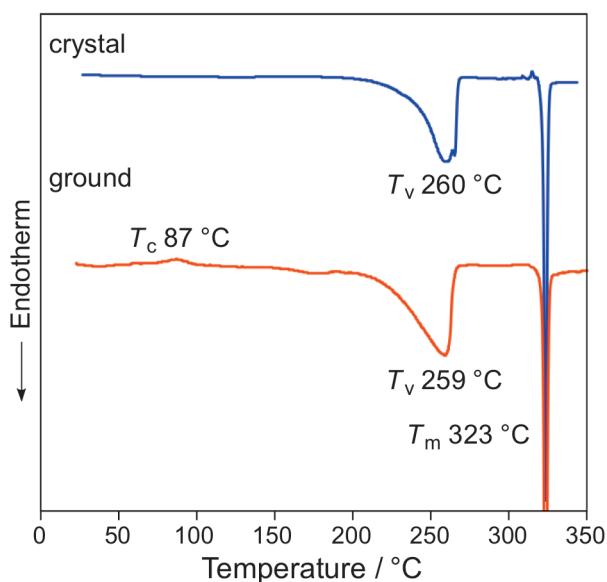

**Fig. S18** DSC thermograms of **1•2c** for powdered crystalline sample (blue line) and ground sample (red sample).  $T_v$ ,  $T_c$ , and  $T_m$  values are noted near the corresponding peaks.

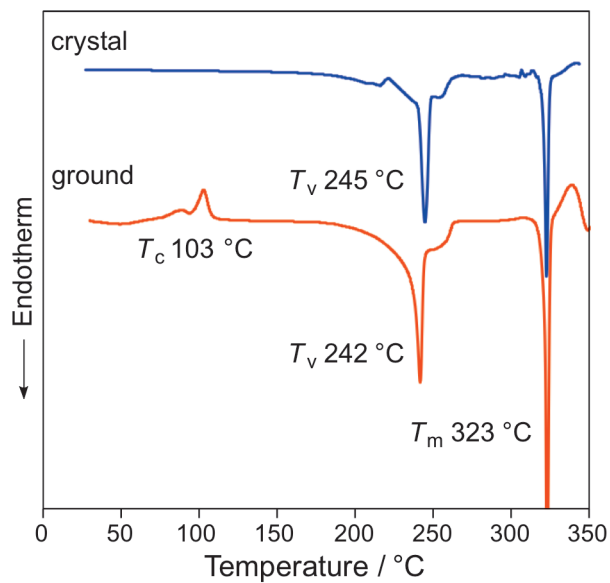

**Fig. S19** DSC thermograms of **1·2d** for powdered crystalline sample (blue line) and ground sample (red sample).  $T_v$ ,  $T_c$ , and  $T_m$  values are noted near the corresponding peaks.

## 7. Powder X-ray diffraction analyses of 4/2a–d

PXRD analyses of the mixture 4/2a indicated that both 4 and 2a exist as amorphous states (Fig. S20). No diffraction peak attributed to 4 was observed by PXRD analyses of 4/2b–d, although trace diffraction peaks of crystalline 2b–d were detected probably due to the higher crystallinity of 2b–d than 2a (Fig. S21–S23).

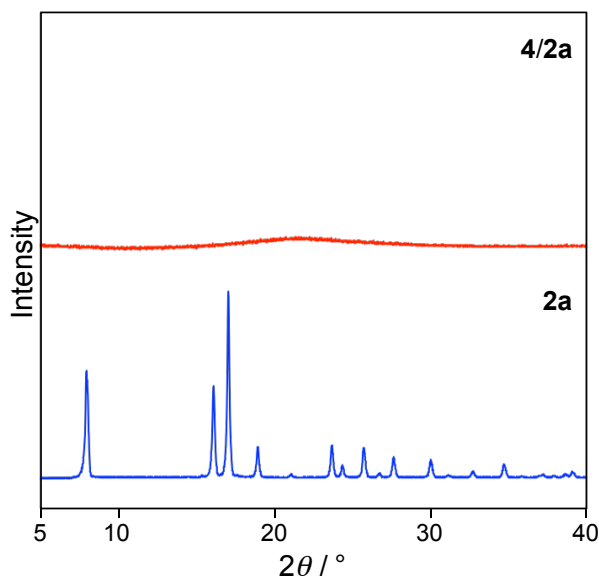

**Fig. S20** PXRD patterns for 4/2a and 2a. Red line: Experimental PXRD pattern of the powdered mixture of 4/2a. Blue line: Experimental PXRD pattern of the crystalline sample of 2a.

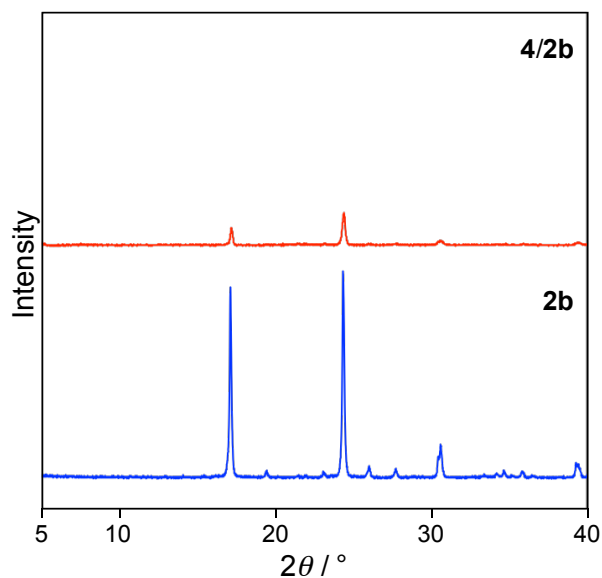

**Fig. S21** PXRD patterns for 4/2b and 2b. Red line: Experimental PXRD pattern of the powdered mixture of 4/2b. Blue line: Experimental PXRD pattern of the crystalline sample of 2b.

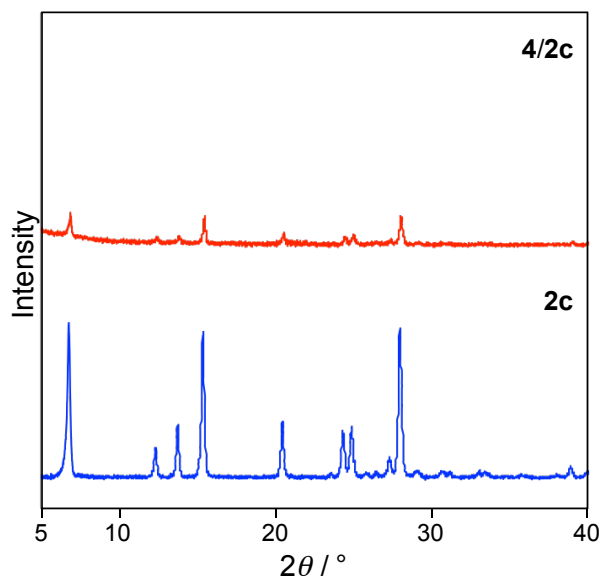

**Fig. S22** PXR D patterns for **4/2c** and **2c**. Red line: Experimental PXR D pattern of the powdered mixture of **4/2c**. Blue line: Experimental PXR D pattern of the crystalline sample of **2c**.

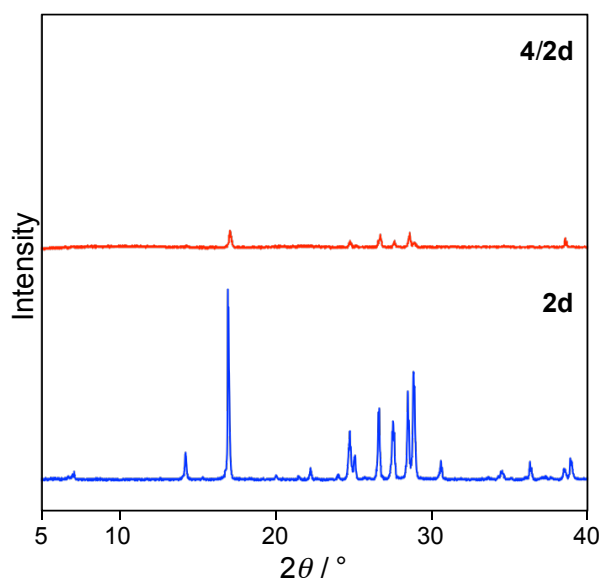

**Fig. S23** PXR D patterns for **4/2d** and **2d**. Red line: Experimental PXR D pattern of the powdered mixture of **4/2d**. Blue line: Experimental PXR D pattern of the crystalline sample of **2d**.

## 8. References

- 1) CrysAlisPro: Data Collection and Processing Software, Rigaku Corporation (2015). Tokyo 196-8666, Japan.
- 2) SIR2011: M. C. Burla, R. Caliandro, M. Camalli, B. Carrozzini, G. L. Cascarano, C. Giacovazzo, M. Mallamo, A. Mazzone, G. Polidori and R. Spagna, *J. Appl. Cryst.*, 2012, **45**, 357.
- 3) CrystalStructure 4.2.5: Crystal Structure Analysis Package, Rigaku Corporation (2000-2017). Tokyo 196-8666, Japan.
- 4) SHELXL Version 2014/7: G. M. Sheldrick, *Acta Cryst.*, 2008, **A64**, 112.
- 5) K. Momma and F. Izumi, *J. Appl. Crystallogr.*, 2011, **44**, 1272.



# <sup>1</sup>H NMR spectrum of **1** (500 MHz, in CDCl<sub>3</sub>, rt)

|                        |                                         |                  |              |                 |            |                      |                                      |         |                  |
|------------------------|-----------------------------------------|------------------|--------------|-----------------|------------|----------------------|--------------------------------------|---------|------------------|
| Acquisition Time (sec) | 3.1719                                  | Comment          | 1125-2+H     | D               | 3.827959   | D1                   | 3.827959                             | DE      | 6                |
| DS                     | 2                                       | Date             | 25 Jan 2019  | 21:23:43        | Date Stamp | 25 Jan 2019          | 21:23:43                             |         |                  |
| File Name              | C:\Users\Asami-Lab\Desktop\1\YDATA\1\1r |                  |              | Frequency (MHz) | 500.1300   | GB                   | 0                                    | INSTRUM | <spect>          |
| LB                     | 0.1                                     | NS               | 8            | Nucleus         | 1H         | Number of Transients | 8                                    | Origin  | spect            |
| Original Points Count  | 32768                                   | Owner            | root         | PC              | 1          | PROBHD               | <5 mm BBO BB-1H Z-GRD Z859001/0006 > |         |                  |
| PULPROG                | <zg30>                                  | Points Count     | 32768        | Pulse Sequence  | zg30       | Receiver Gain        | 456.10                               | SF      | 500.130006648269 |
| SFO1                   | 500.133088507478                        | SI               | 32768        | SSB             | 0          | SW(cyclical) (Hz)    | 10330.58                             |         |                  |
| SWH                    | 10330.5785123967                        | Solvent          | CHLOROFORM-d |                 |            | Spectrum Offset (Hz) | 3074.6074                            |         |                  |
| Spectrum Type          | standard                                | Sweep Width (Hz) | 10330.26     | TD              | 65536      | TD0                  | 1                                    | TE      | 298.9            |
| Temperature (degree C) | 25.900                                  | WDW              | 1            |                 |            |                      |                                      |         |                  |

Desktop.001.001.1r.esp

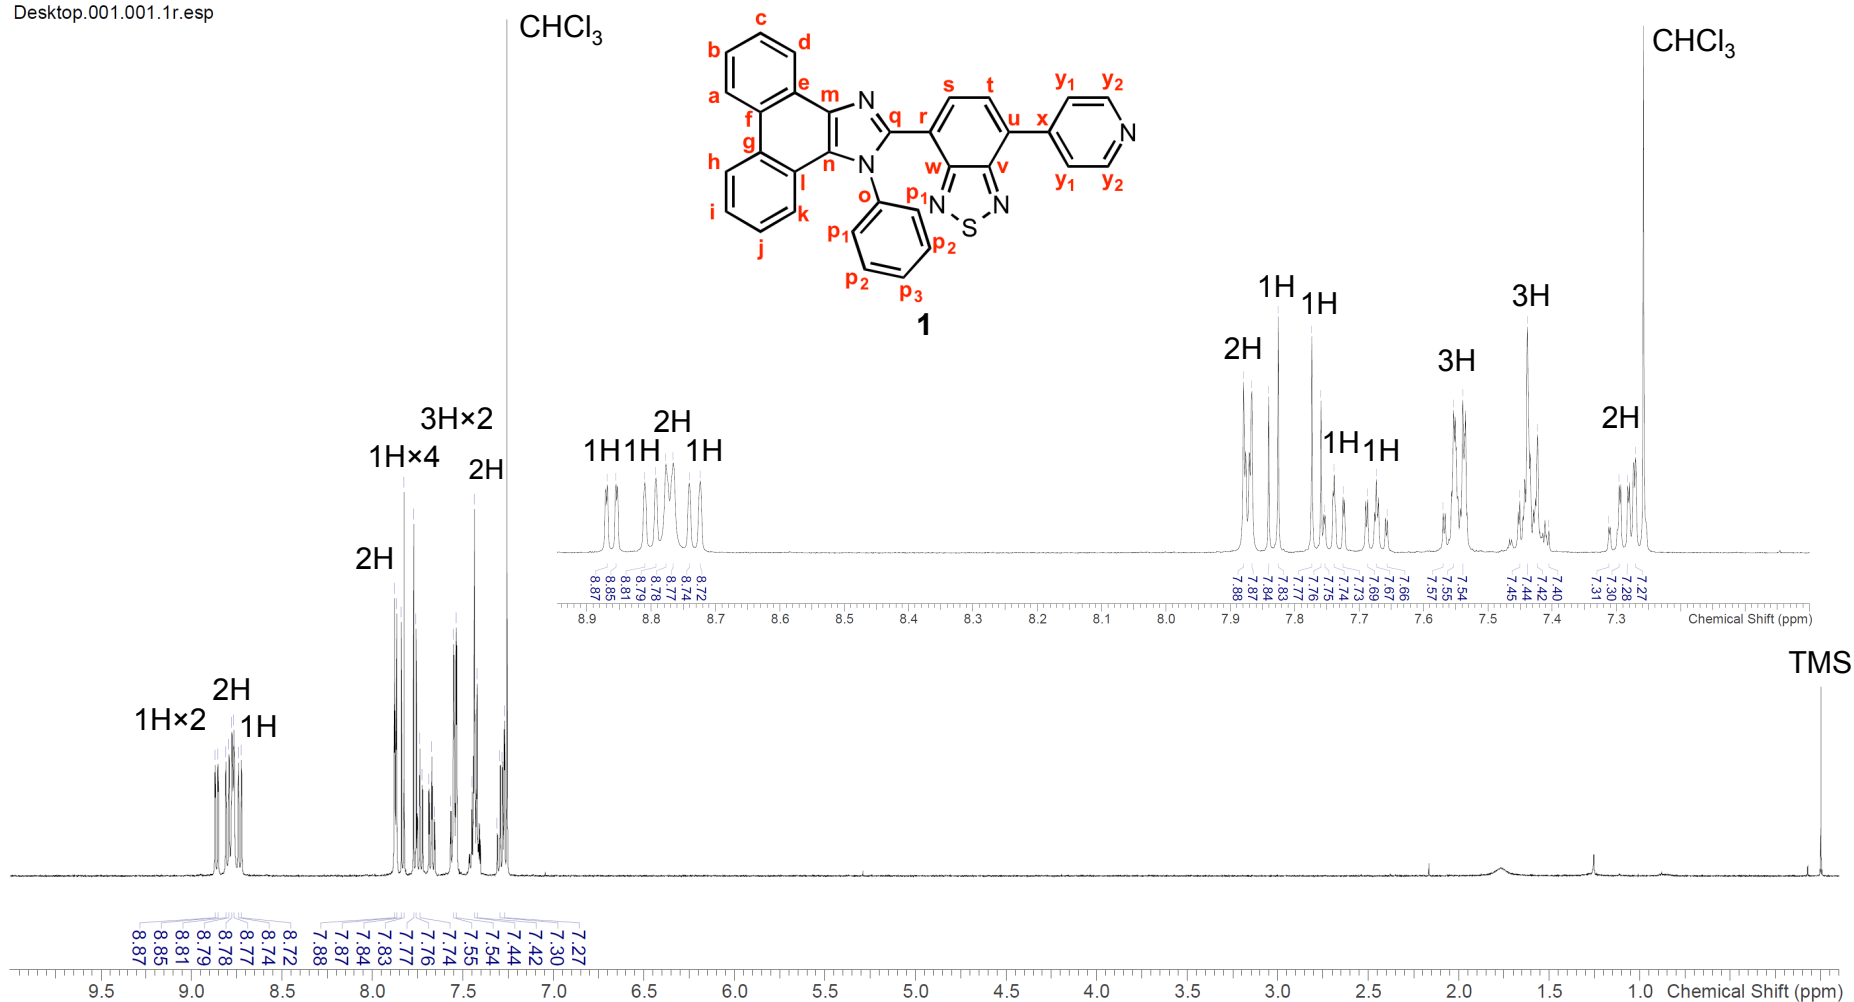

# Partial <sup>1</sup>H NMR spectrum of **1** (500 MHz, in CDCl<sub>3</sub>, rt)

|                        |                                        |                  |                      |                      |                      |                      |                                      |         |                  |
|------------------------|----------------------------------------|------------------|----------------------|----------------------|----------------------|----------------------|--------------------------------------|---------|------------------|
| Acquisition Time (sec) | 3.1719                                 | Comment          | 1125-2+H             | D                    | 3.827959             | D1                   | 3.827959                             | DE      | 6                |
| DS                     | 2                                      | Date             | 25 Jan 2019 21:23:43 | Date Stamp           | 25 Jan 2019 21:23:43 | GB                   | 0                                    | INSTRUM | <spect>          |
| File Name              | C:\Users\Asami-Lab\Desktop\1\PDAT\1\1r |                  | Frequency (MHz)      | 500.1300             | GB                   | 0                    | INSTRUM                              | <spect> |                  |
| LB                     | 0.1                                    | NS               | 8                    | Nucleus              | 1H                   | Number of Transients | 8                                    | Origin  | spect            |
| Original Points Count  | 32768                                  | Owner            | root                 | PC                   | 1                    | PROBHD               | <5 mm BBO BB-1H Z-GRD Z859001/0006 > |         |                  |
| PULPROG                | <zg30>                                 | Points Count     | 32768                | Pulse Sequence       | zg30                 | Receiver Gain        | 456.10                               | SF      | 500.130006648269 |
| SFO1                   | 500.133088507478                       | SI               | 32768                | SSB                  | 0                    | SW(cyclical) (Hz)    | 10330.58                             |         |                  |
| SWH                    | 10330.5785123967                       | Solvent          | CHLOROFORM-d         | Spectrum Offset (Hz) | 3074.6074            |                      |                                      |         |                  |
| Spectrum Type          | standard                               | Sweep Width (Hz) | 10330.26             | TD                   | 65536                | TD0                  | 1                                    | TE      | 298.9            |
| Temperature (degree C) | 25.900                                 | WDW              | 1                    |                      |                      |                      |                                      |         |                  |

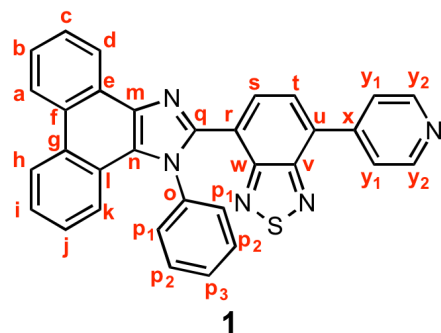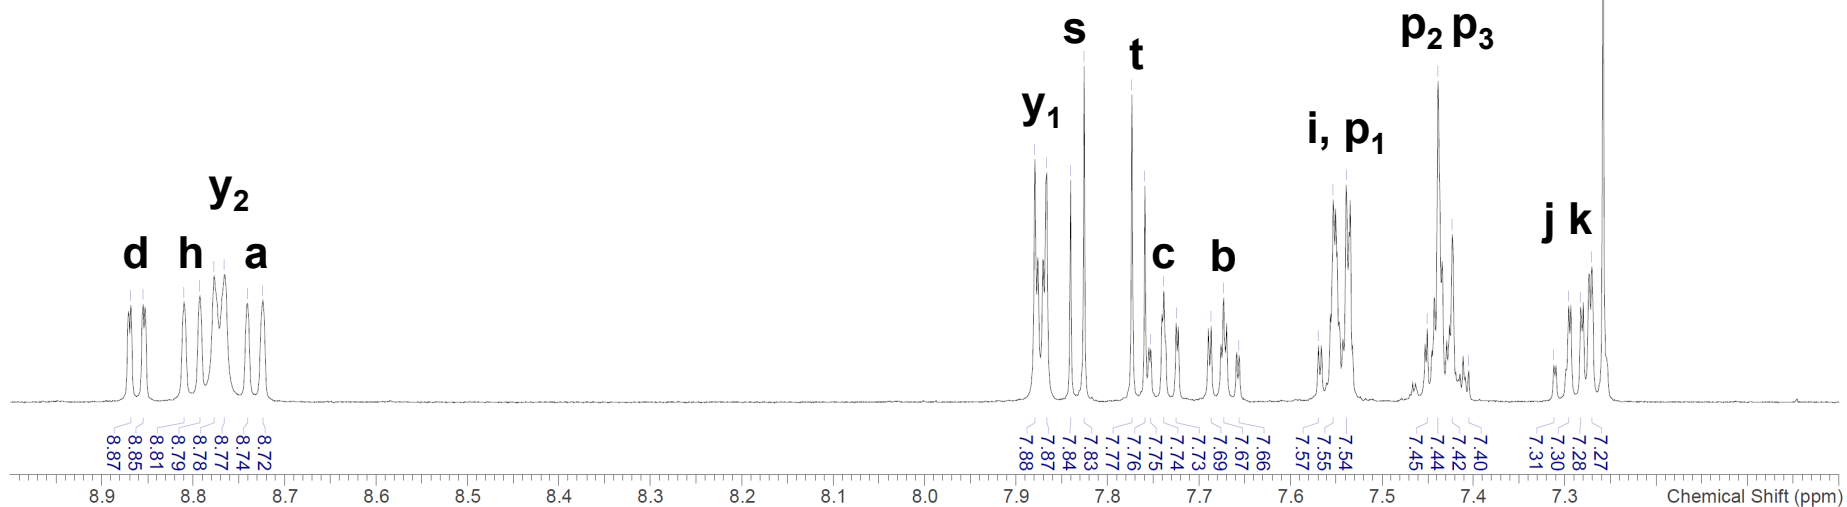

# <sup>13</sup>C NMR spectrum of **1** (126 MHz, in CDCl<sub>3</sub>, rt)

|                        |                                          |                  |              |                      |                      |                      |                                      |         |            |
|------------------------|------------------------------------------|------------------|--------------|----------------------|----------------------|----------------------|--------------------------------------|---------|------------|
| Acquisition Time (sec) | 1.0912                                   | D                | 0.00345      | D1                   | 2                    | DE                   | 6                                    | DS      | 4          |
| Date                   | 17 Oct 2018 10:47:49                     |                  |              | Date Stamp           | 17 Oct 2018 10:47:49 |                      |                                      |         |            |
| File Name              | C:\Users\Asami-Lab\Desktop\10\PDATA\1\1r |                  |              | Frequency (MHz)      | 125.7578             | GB                   | 0                                    | INSTRUM | <spect>    |
| LB                     | 1                                        | NS               | 1024         | Nucleus              | 13C                  | Number of Transients | 1024                                 | Origin  | spect      |
| Original Points Count  | 32768                                    | Owner            | root         | PC                   | 1.4                  | PROBHD               | <5 mm BBO BB-1H Z-GRD Z859001/0006 > |         |            |
| PULPROG                | <zpgp30>                                 | Points Count     | 32768        | Pulse Sequence       | zpgp30               | Receiver Gain        | 4597.60                              | SF      | 125.757789 |
| SFO1                   | 125.770364304853                         | SI               | 32768        | SSB                  | 0                    | SW(cyclical) (Hz)    | 30030.03                             |         |            |
| SWH                    | 30030.03003003                           | Solvent          | CHLOROFORM-d | Spectrum Offset (Hz) | 12572.4346           |                      |                                      |         |            |
| Spectrum Type          | standard                                 | Sweep Width (Hz) | 30029.11     | TD                   | 65536                | TDO                  | 1                                    | TE      | 299.5      |
| Temperature (degree C) | 26.500                                   | WDW              | 1            |                      |                      |                      |                                      |         |            |

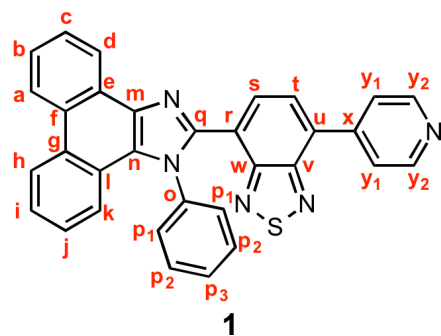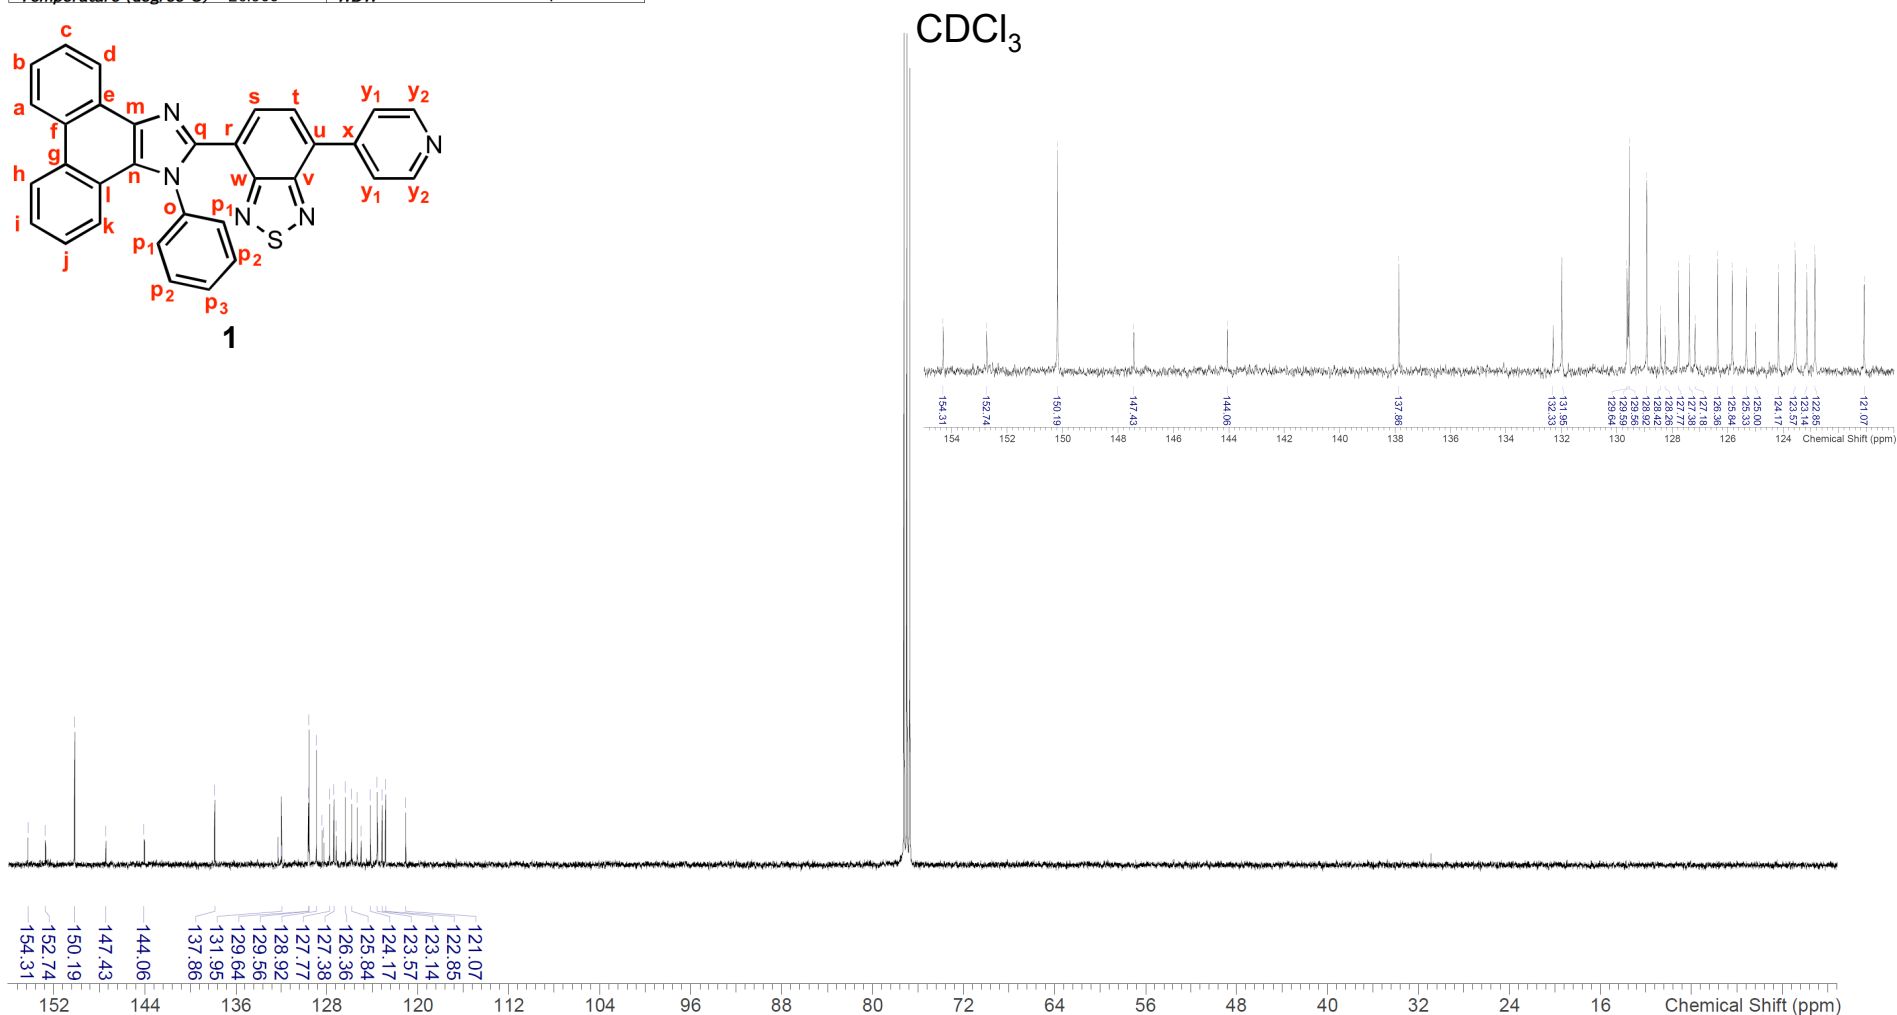

# Partial $^{13}\text{C}$ NMR spectrum of **1** (500 MHz, in $\text{CDCl}_3$ , rt)

|                        |                                          |                  |                      |                |                 |                      |                                      |                      |            |
|------------------------|------------------------------------------|------------------|----------------------|----------------|-----------------|----------------------|--------------------------------------|----------------------|------------|
| Acquisition Time (sec) | 1.0912                                   | D                | 0.00345              | D1             | 2               | DE                   | 6                                    | DS                   | 4          |
| Date                   | 17 Oct 2018 10:47:49                     | Date Stamp       | 17 Oct 2018 10:47:49 |                |                 |                      |                                      |                      |            |
| File Name              | C:\Users\Asami-Lab\Desktop\10\PDATA\1\1r | Frequency (MHz)  | 125.7578             | GB             | 0               | INSTRUM              | <spect>                              |                      |            |
| LB                     | 1                                        | NS               | 1024                 | Nucleus        | $^{13}\text{C}$ | Number of Transients | 1024                                 | Origin               | spect      |
| Original Points Count  | 32768                                    | Owner            | root                 | PC             | 1.4             | PROBHD               | <5 mm BBO BB-1H Z-GRD Z859001/0006 > |                      |            |
| PULPROG                | <zpgg30>                                 | Points Count     | 32768                | Pulse Sequence | zpgg30          | Receiver Gain        | 4597.60                              | SF                   | 125.757789 |
| SFO1                   | 125.770364304853                         | SI               | 32768                | SSB            | 0               | SW(cyclical) (Hz)    | 30030.03                             | Spectrum Offset (Hz) | 12572.4346 |
| SWH                    | 30030.03003003                           | Solvent          | CHLOROFORM-d         | TD             | 65536           | TD0                  | 1                                    | TE                   | 299.5      |
| Spectrum Type          | standard                                 | Sweep Width (Hz) | 30029.11             |                |                 |                      |                                      |                      |            |
| Temperature (degree C) | 26.500                                   | WDW              | 1                    |                |                 |                      |                                      |                      |            |

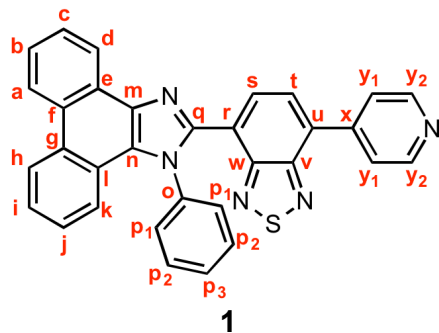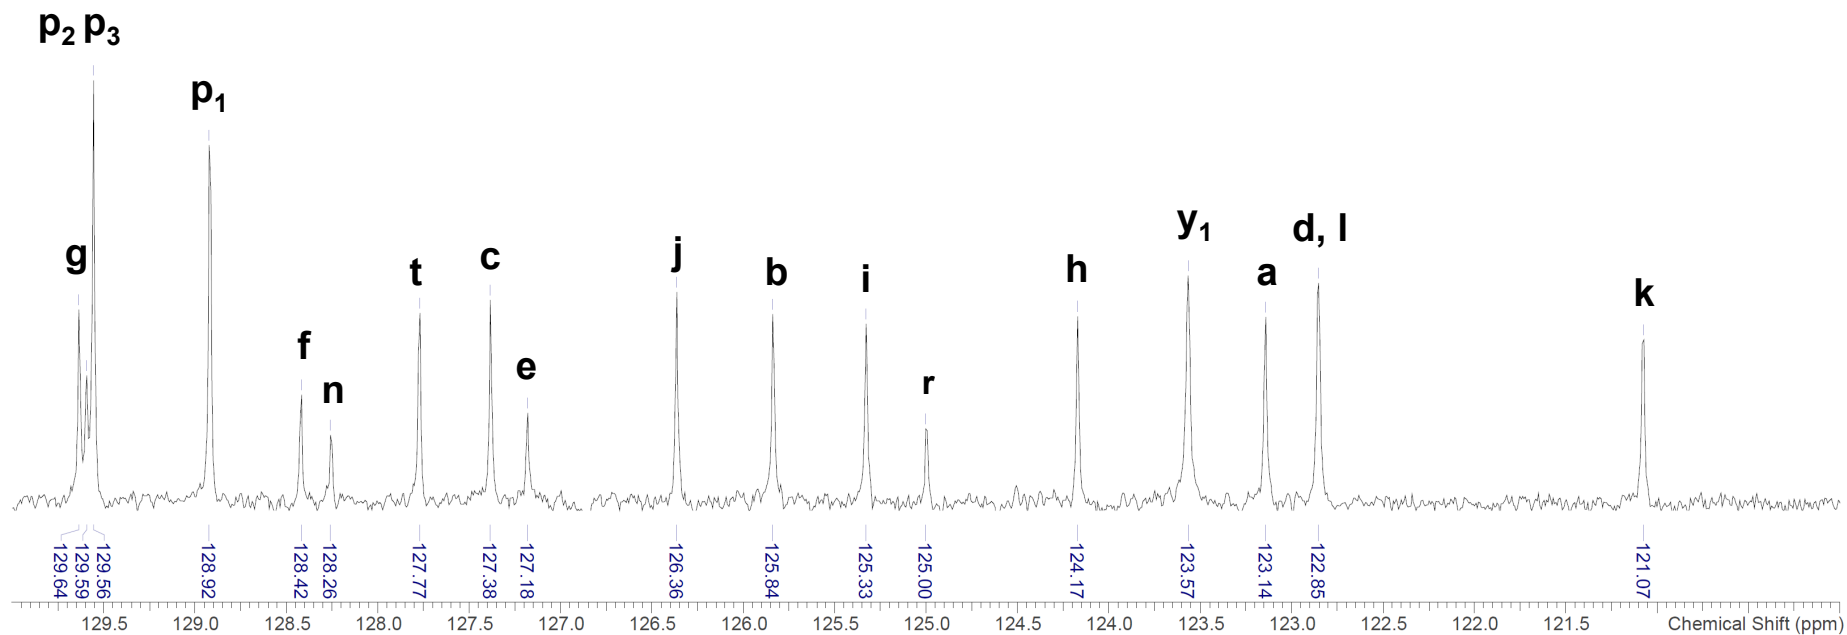

# Partial $^{13}\text{C}$ NMR spectrum of **1** (500 MHz, in $\text{CDCl}_3$ , rt)

|                        |                                          |                  |                      |                |                 |                      |                                      |                      |            |
|------------------------|------------------------------------------|------------------|----------------------|----------------|-----------------|----------------------|--------------------------------------|----------------------|------------|
| Acquisition Time (sec) | 1.0912                                   | D                | 0.00345              | D1             | 2               | DE                   | 6                                    | DS                   | 4          |
| Date                   | 17 Oct 2018 10:47:49                     | Date Stamp       | 17 Oct 2018 10:47:49 |                |                 |                      |                                      |                      |            |
| File Name              | C:\Users\Asami-Lab\Desktop\10\PDATA\1\1r | Frequency (MHz)  | 125.7578             | GB             | 0               | INSTRUM              | <spect>                              |                      |            |
| LB                     | 1                                        | NS               | 1024                 | Nucleus        | $^{13}\text{C}$ | Number of Transients | 1024                                 | Origin               | spect      |
| Original Points Count  | 32768                                    | Owner            | root                 | PC             | 1.4             | PROBHD               | <5 mm BBO BB-1H Z-GRD Z859001/0006 > |                      |            |
| PULPROG                | <zpgg30>                                 | Points Count     | 32768                | Pulse Sequence | zpgg30          | Receiver Gain        | 4597.60                              | SF                   | 125.757789 |
| SFO1                   | 125.770364304853                         | SI               | 32768                | SSB            | 0               | SW(cyclical) (Hz)    | 30030.03                             |                      |            |
| SWH                    | 30030.03003003                           | Solvent          | CHLOROFORM-d         | TD             | 65536           | TD0                  | 1                                    | Spectrum Offset (Hz) | 12572.4346 |
| Spectrum Type          | standard                                 | Sweep Width (Hz) | 30029.11             |                |                 |                      |                                      | TE                   | 299.5      |
| Temperature (degree C) | 26.500                                   | WDW              | 1                    |                |                 |                      |                                      |                      |            |

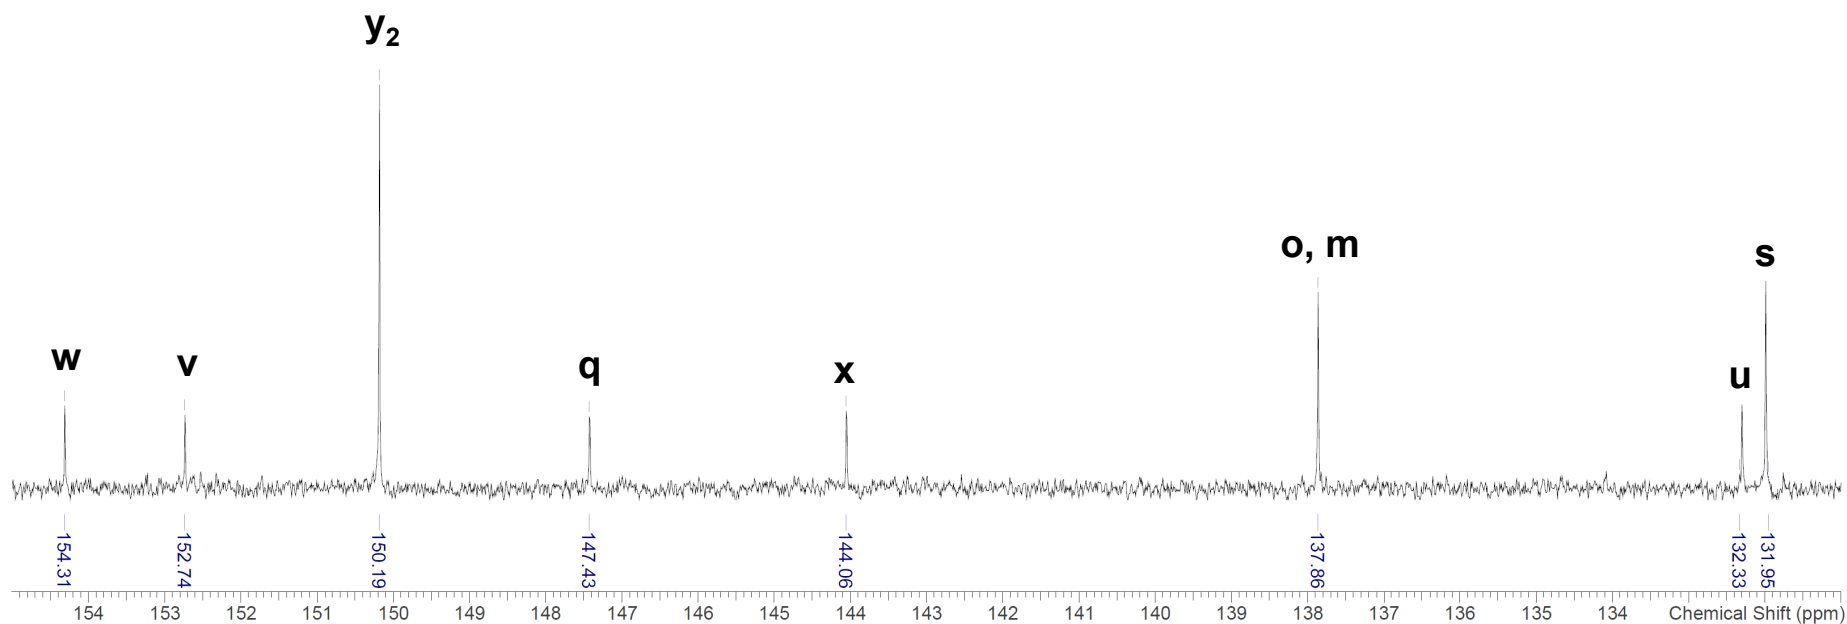

# Partial COSY spectrum of **1** (500 MHz, in CDCl<sub>3</sub>, rt)

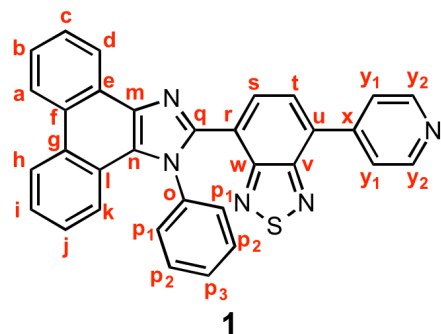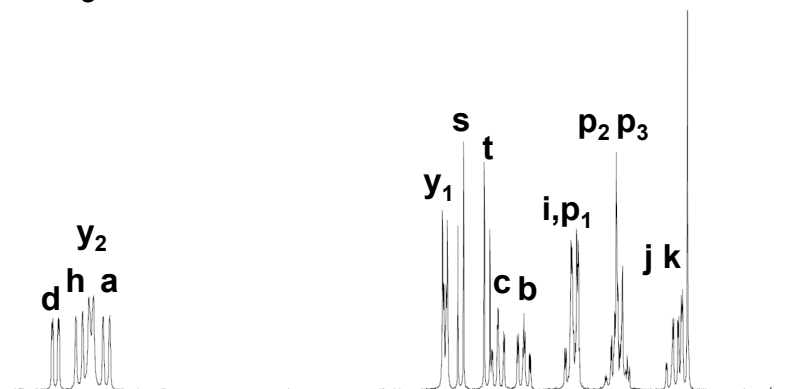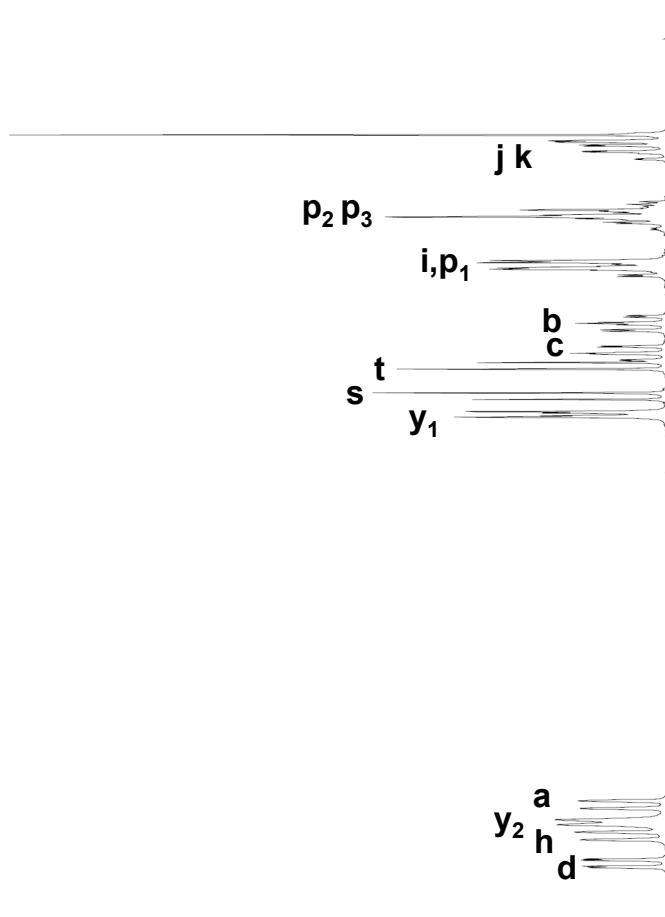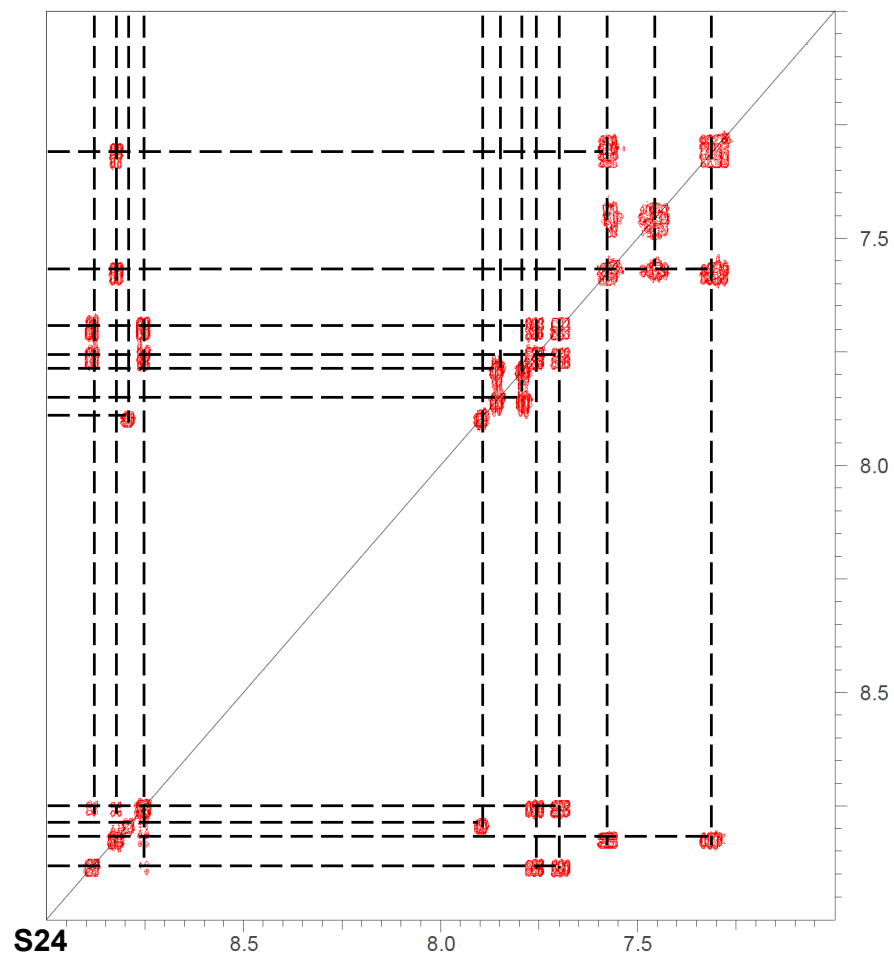

# Partial HSQC spectrum of **1** (500 MHz, in CDCl<sub>3</sub>, rt)

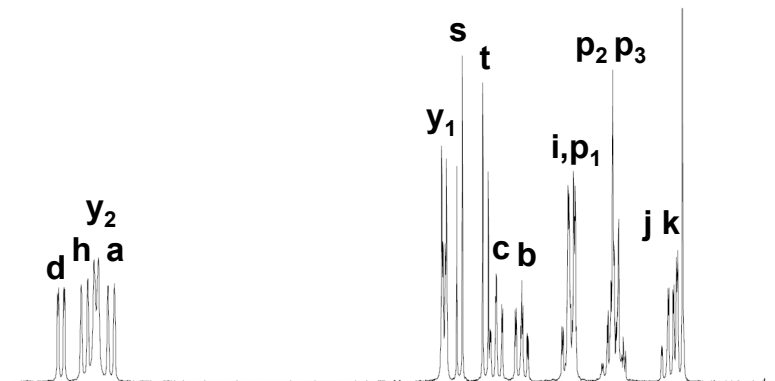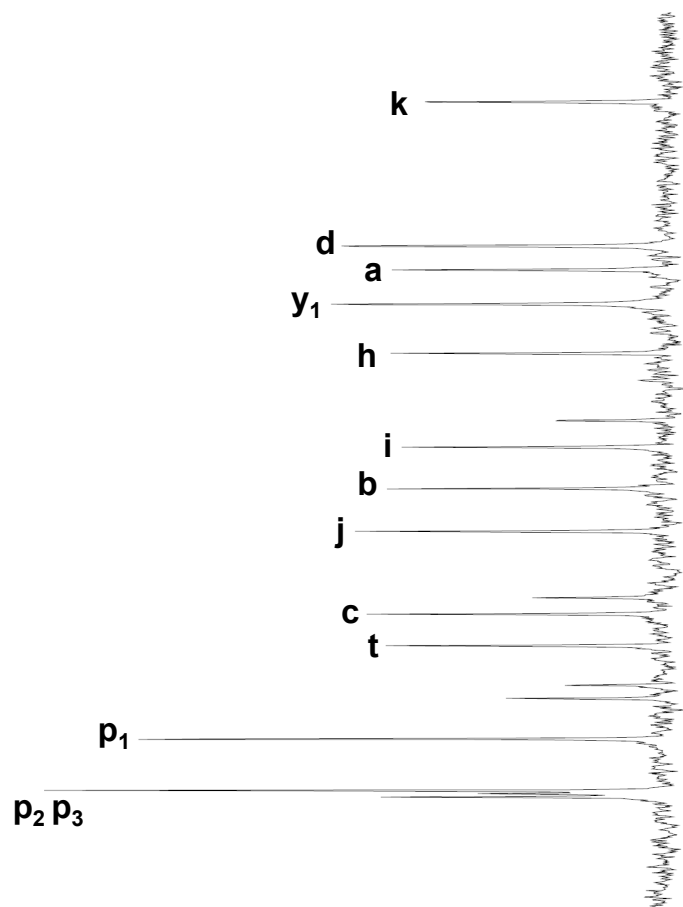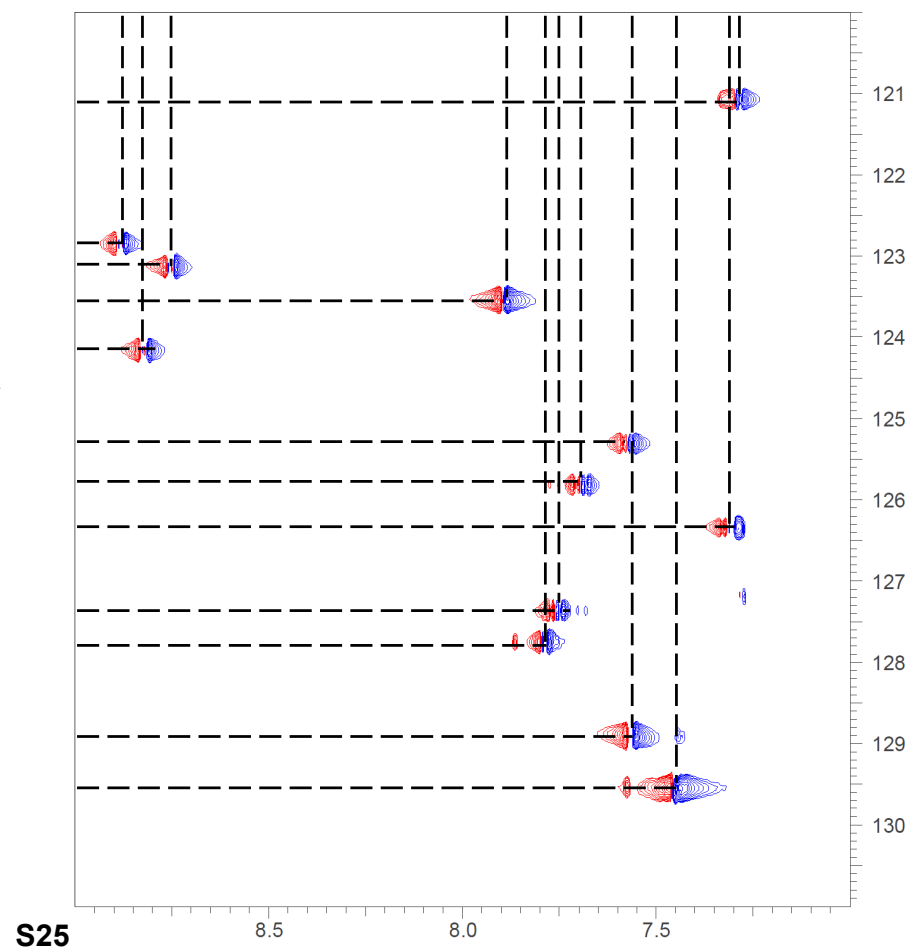



# Partial HSQC spectrum of **1** (500 MHz, in CDCl<sub>3</sub>, rt)

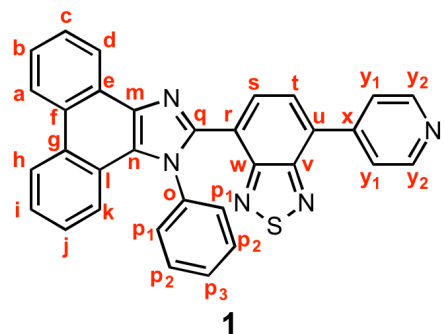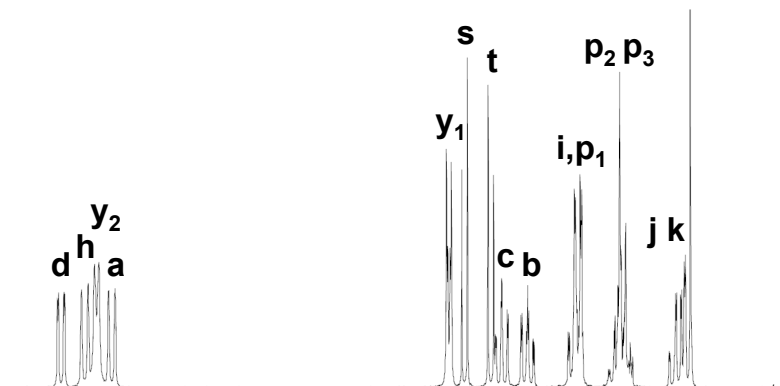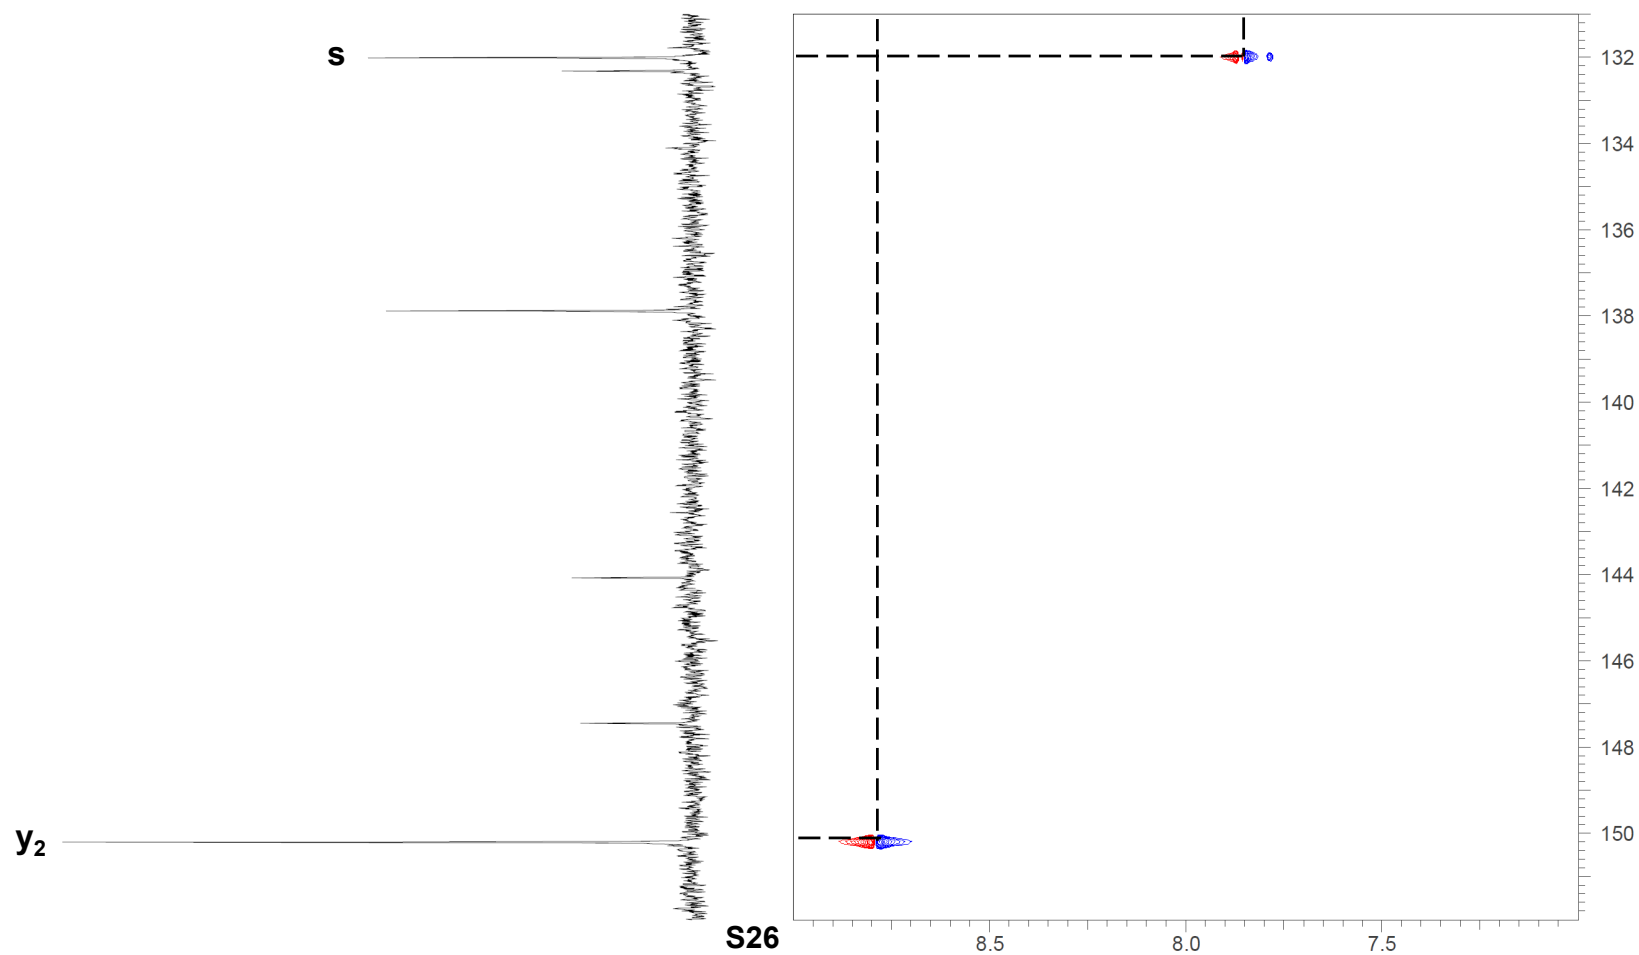

# Partial HMBC spectrum of **1** (500 MHz, in CDCl<sub>3</sub>, rt)

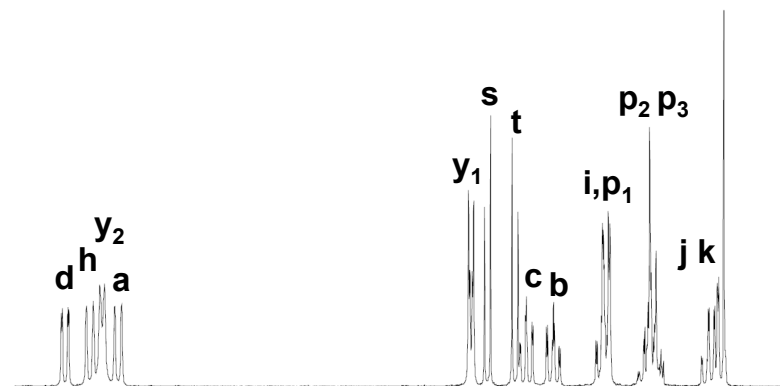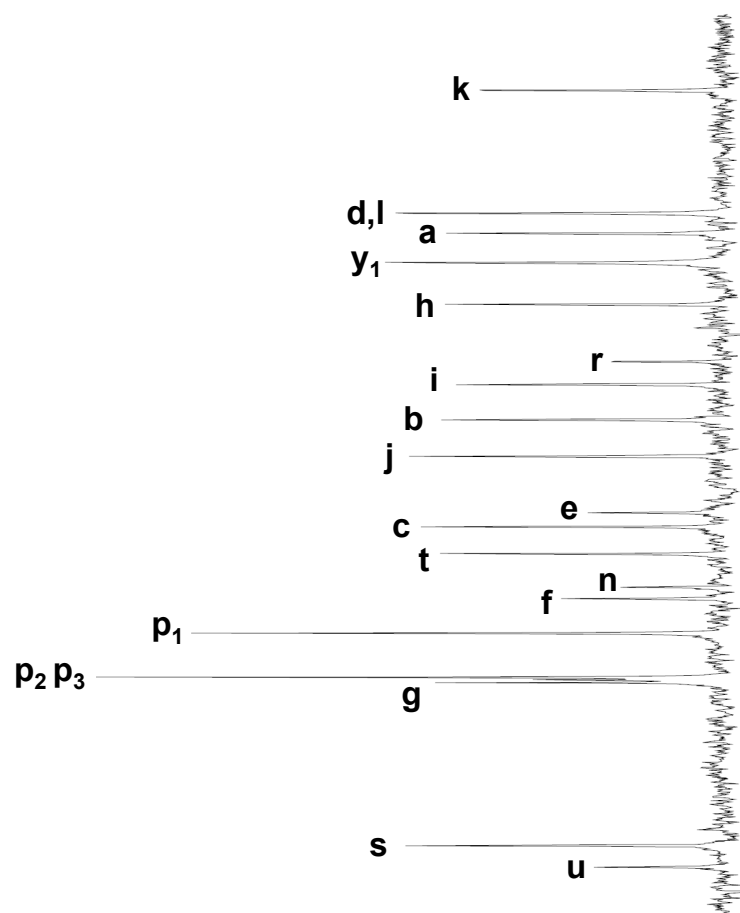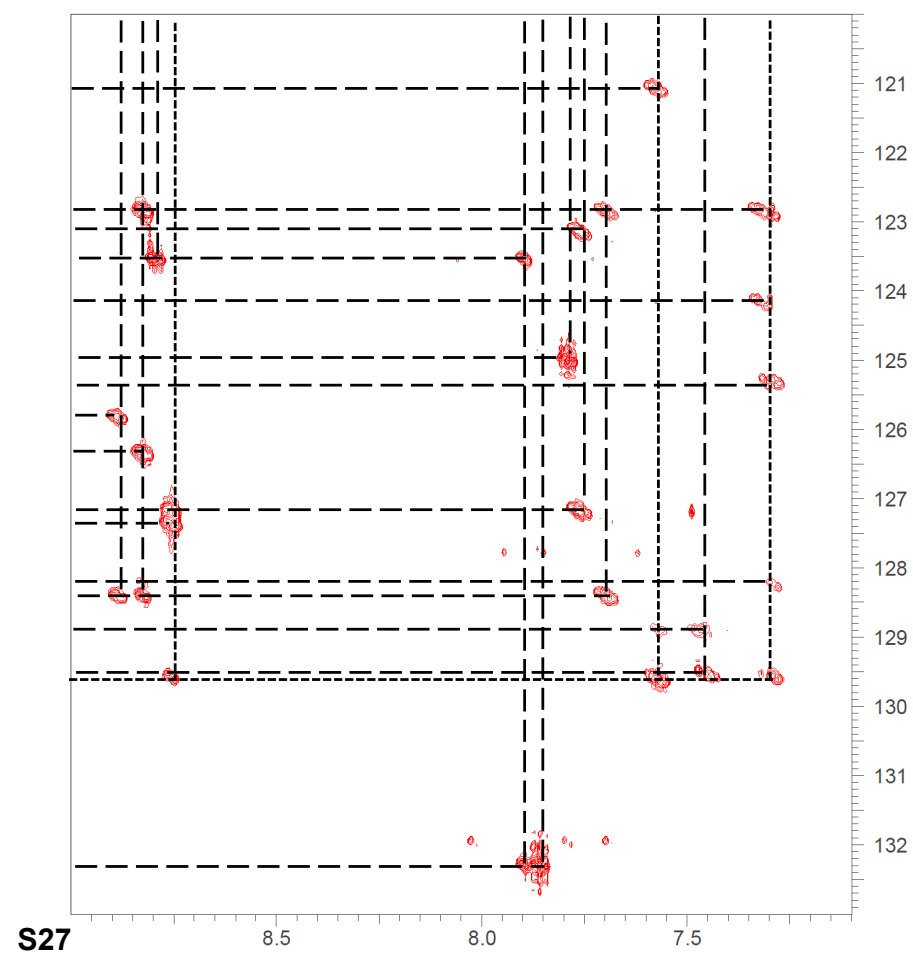

# Partial HMBC spectrum of **1** (500 MHz, in CDCl<sub>3</sub>, rt)

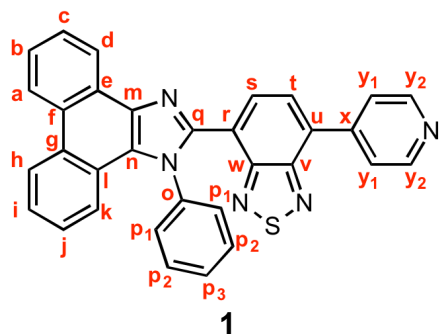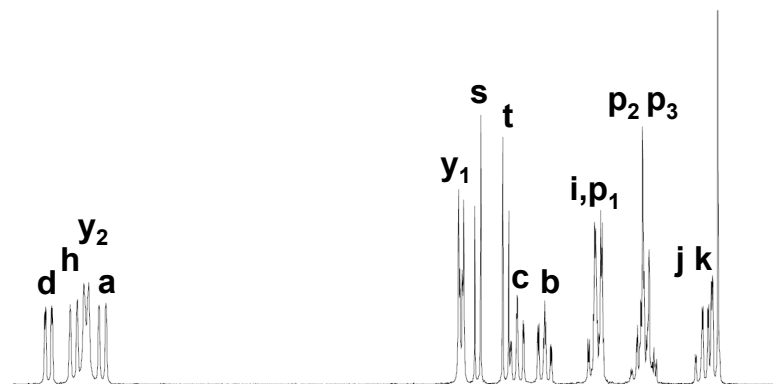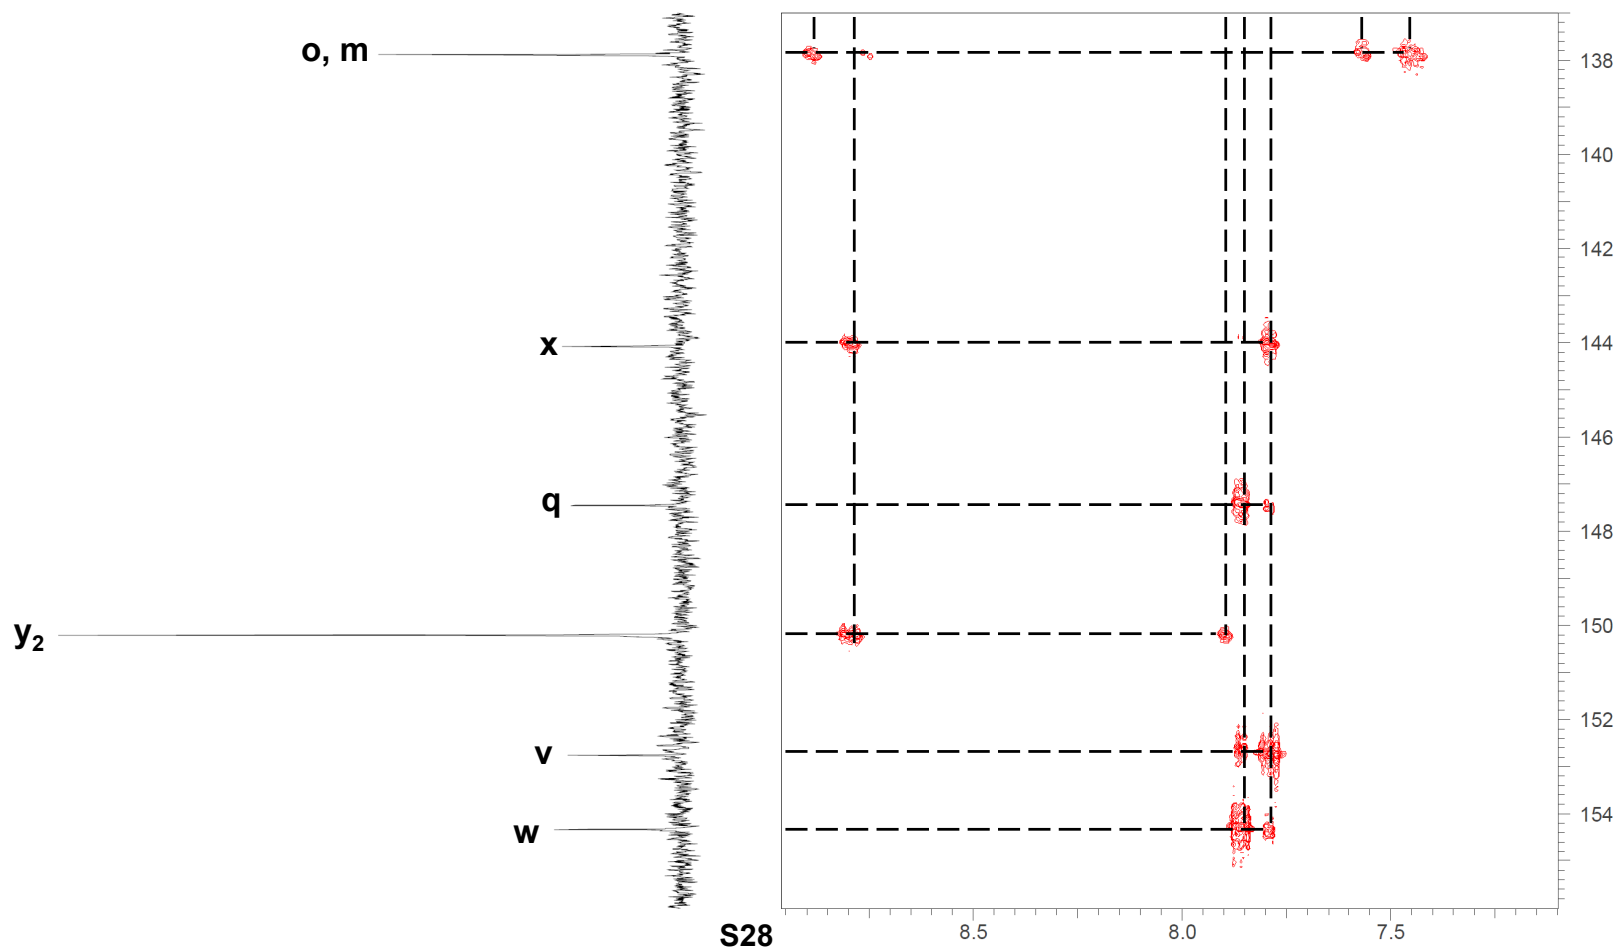

Supplement: c9ce01037h1.pdf [file c9ce01037h1.pdf]
